# Supplementary material for: A Regional Perspective of Socio-Ecological Predictors for Fruit and Nut Tree Varietal Diversity Maintained by Farmer Communities in Central Asia
Source: MDPI journal article supplement (doi:10.3390/world5010002), 2024-01-11
Supplement: s1 [file s1]

## Supplementary Materials

**Table S1. Description of the selected agroecosystems and project sites in the region.**

|                   | <i>Crop/species</i>                | <i>Region</i>     | <i>Agroecosystem</i>              | <i>Project sites</i>                                                                                                                                                                    |
|-------------------|------------------------------------|-------------------|-----------------------------------|-----------------------------------------------------------------------------------------------------------------------------------------------------------------------------------------|
| <b>Kazakhstan</b> |                                    |                   |                                   |                                                                                                                                                                                         |
| <b>1</b>          | <b>Apple<br/>(<i>Malus</i> sp)</b> | Jungar Alatau     | Medium hills<br>Rainfed           | Sarkhan district: Sarkand, Topolevka, Koily villages.<br>Alakhul district: Lepsinsk, Kabanbai villages.                                                                                 |
|                   |                                    | Ketmen            | Low hills<br>Rainfed/irrigated    | Uygur district: Shonji, Ketmen villages.                                                                                                                                                |
|                   |                                    |                   | Medium hills<br>Rainfed           | Uygur district: Koldjat vil.                                                                                                                                                            |
|                   |                                    | Zailiyskiy Alatau | Medium hills<br>Rainfed/irrigated | Enbekshi-Kazakh district: Turgen, Issyk villages.<br>Talgat district: Kotu-bulak gorge.<br>Karasay district: Kamenka vil                                                                |
|                   |                                    | Chuiy Mountain    | Low hills<br>Rainfed/irrigated    | Ryskulov district: Kulan vil.                                                                                                                                                           |
|                   |                                    | Kyrgyz Alatau     | Low hills<br>Rainfed/irrigated    | Merken district: Merke vil.<br>Ryskulov district: Kulan vil.                                                                                                                            |
|                   |                                    | Karatau           | Low hills<br>Rainfed/irrigated    | Juvalinskiy district: Mashat vil.<br>Tulkubasskiy district: Tulkubas vil., Boroltai vil.<br>Saryagash district: vil. named after K.Konusbaev<br>Makhtaaral district: Zhemis-Zhidek vil. |
|                   |                                    |                   | Medium hills<br>Rainfed/irrigated | Tulkubasskiy district: Koktal, Zhualy villages                                                                                                                                          |
| <b>2</b>          | <b>Pear<br/>(<i>Pyrus</i> sp)</b>  | Chuiy Mountain    | Low hills<br>Rainfed/irrigated    | Ryskulov district: Kulan vil                                                                                                                                                            |
|                   |                                    | Kyrgyz Alatau     | Low hills<br>Rainfed/irrigated    | Merken district: Krasniy Oktyabr vil.<br>Baizakov district: Akir Tube vil.                                                                                                              |
|                   |                                    |                   | Medium hills<br>Rainfed/irrigated | Merken district: Plodovojagodniy vil.                                                                                                                                                   |

|                   | <i>Crop/species</i>                           | <i>Region</i>            | <i>Agroecosystem</i>              | <i>Project sites</i>                                                                                                                             |
|-------------------|-----------------------------------------------|--------------------------|-----------------------------------|--------------------------------------------------------------------------------------------------------------------------------------------------|
|                   |                                               | Karatau                  | Low hills<br>Rainfed/irrigated    | Tulkubasskiy district: Amangeldi vil.                                                                                                            |
|                   |                                               |                          | Medium hills<br>Rainfed/irrigated | Tulkubasskiy district: Michurin vil.                                                                                                             |
|                   |                                               | Jungar Alatau            | Low hills<br>Rainfed/irrigated    | Sarkandskiy district: Topolevka vil.<br>Uygur district: Koksul vil.                                                                              |
|                   |                                               | Zailiyskiy Alatau        | Low hills<br>Rainfed              | Talgar district: Baibulak vil.                                                                                                                   |
|                   |                                               |                          | Medium hills<br>Rainfed           | Talgar district: Almalyk vil.                                                                                                                    |
| 3                 | <b>Apricot</b><br>( <i>Prunus armeniaca</i> ) | Karjantau                | Low hills<br>Irrigated            | Saryagach district: Derbisek vil.<br>Makhtaaral district: Zhemis-Zhidek vil.                                                                     |
|                   |                                               | Ketmen                   | Low hills<br>Rainfed/irrigated    | Uygur district: Shonji, Dardamty, Ketmen vil.                                                                                                    |
|                   |                                               |                          | Medium hills<br>Rainfed           | Uygur district: Koldjat vil.                                                                                                                     |
|                   |                                               | Zailiyskiy Alatau        | Low hills<br>Rainfed              | Enbekshi-Kazakh district: Baisent, Bijanov, Dihan villages.                                                                                      |
|                   |                                               |                          | Medium hills<br>Rainfed           | Talgar district: Belbulak, Koturbulak, Prjamoe; Talgar gorges.<br>Enbekshi-Kazakh district: Issyk gorge.<br>Kurdai district: Karakunuz forestry. |
| 4                 | <b>Grapevine (<i>Vitis</i> sp)</b>            | Southern Kazakhstan      | Low hills<br>Rainfed/irrigated    | Saryagach district: Kaplanbek vil.<br>Makhtaaral district: Zhemis-Zhidek vil.                                                                    |
|                   |                                               |                          | Medium hills<br>Rainfed/irrigated | Tulkubas district: Zhualy vil., vil. named after T.Ryskulov<br>Sayram district: Sayram, Karamurt villages                                        |
|                   |                                               | South-Eastern Kazakhstan | Low hills<br>Irrigated            | Panfilov district: Bedjin, Koktal villages.<br>Uygur district: Shonji vil.                                                                       |
| <b>Kyrgyzstan</b> |                                               |                          |                                   |                                                                                                                                                  |
| 1                 | <b>Alycha</b><br>( <i>Prunus cerasifera</i> ) | Jalalabad Province       | Mountain<br>Rainfed               | Karaalma forestry: Urunbash, Karaalma vil.<br>Arslanbob forestry: Gumkhana, Djaiterek, Dashman.                                                  |

|            | <i>Crop/species</i>                                                              | <i>Region</i>                      | <i>Agroecosystem</i>              | <i>Project sites</i>                                                                                                                                                     |
|------------|----------------------------------------------------------------------------------|------------------------------------|-----------------------------------|--------------------------------------------------------------------------------------------------------------------------------------------------------------------------|
|            |                                                                                  |                                    |                                   | Kaba forestry: Akterek.                                                                                                                                                  |
| 2          | Apple<br>( <i>Malus sp</i> )                                                     | Jalalabad Province                 | Mountain and foothills<br>Rainfed | Karaalma forestry: Urunbash, Karaalma, Jalgyz-Janak villages.<br>Arslanbob forestry: Gumkhana, Jai-Terek, Dashman.<br>Gavinskiy forestry: Kaba, Ak Terek vil.            |
| 3          | Sea buckthorn<br>( <i>Hippophae rhamnoides</i> )<br>Currant ( <i>Ribes spp</i> ) | Issyk Kul Province                 | Mountain<br>Rainfed               | Issyk Kul forestry,<br>Djatioguz forestry: AksuiIssyk Kul forestry                                                                                                       |
|            |                                                                                  | Naryn Province                     | Mountain<br>Rainfed               | Salkyn Tor Nature park,<br>Flood lands of Naryn river<br>Salkyn Tor Nature park                                                                                          |
| 4          | Grapevine ( <i>Vitis sp</i> )                                                    | Chui Valley                        | Mountain & foothills<br>Rainfed   | Sokuluk distrtrict: Kashka Bash village.<br>Moscovskiy district: Asyl Bash village.<br>Chui distrtrict: Saylyk village.                                                  |
|            |                                                                                  | Osh Province                       | Mountain & foothills<br>Rainfed   | Aravan district: Aravan vil.<br>Karasu district: Karasu vi.                                                                                                              |
|            |                                                                                  | Jalalabad Province                 | Mountain & foothills<br>Rainfed   | Aksyiskiy forestry: Krupsay, Aflatunsk.<br>Suzak district: Oktiybrskoe village.                                                                                          |
| 5          | Pistachio<br>( <i>Pistacia vera</i> )                                            | Jalalabad Province                 | Foothills<br>Rainfed              | Toskool-Ata forestry: Khara Miste, Alash.<br>Kochkor Ata forestry: Kuduk, Kok Tash, Mailusuu.<br>Karaalma forestry: Suzak.                                               |
| 6          | Walnut<br>( <i>Juglans regia</i> )                                               | Osh Province                       | Mountain<br>Rainfed               | Mirzaakin forestry: Uzgen.                                                                                                                                               |
|            |                                                                                  | Jalalabad Province                 | Mountain<br>Rainfed               | Kaba forestry: Akterek.<br>Arslanbob forestry: Gumkhan, Djaiterek, Dashman.<br>Arkyt forestry: Kyzyl Ungur.<br>Ortok forestry: Kadu;<br>Karaalma forestry: Karaalma vil. |
| Tajikistan |                                                                                  |                                    |                                   |                                                                                                                                                                          |
|            | Apple<br>( <i>Malus sp</i> )                                                     | Northern Tajikistan, Sugd province | Valley<br>Rainfed                 | Asht district: Shaidon and Pongoz vil.                                                                                                                                   |

|                       | <i>Crop/species</i>                                                                                                                                     | <i>Region</i>                                                    | <i>Agroecosystem</i>                 | <i>Project sites</i>                                                                                                                                      |
|-----------------------|---------------------------------------------------------------------------------------------------------------------------------------------------------|------------------------------------------------------------------|--------------------------------------|-----------------------------------------------------------------------------------------------------------------------------------------------------------|
|                       |                                                                                                                                                         |                                                                  | Mountain<br>Semi Rainfed             | Gorno-Matchinsk district:<br>Paldorak, Obburdan vil.<br>Penjikent district : Jeri, Dashti<br>Kozi vil.                                                    |
|                       |                                                                                                                                                         |                                                                  | Foothills<br>Irrigated               | Isfara district: Vorukh, Chorkukh,<br>Kulkand vil.<br>Shakhristan district: Oktangi vil.,<br>Shakhristan settlement.                                      |
|                       |                                                                                                                                                         | Western Pamir,<br>Gorno-<br>Badakhshan<br>autonomous<br>province | Mountain<br>Semi Rainfed             | Darvaz district: Kalaikhumb,<br>Kurgovad vil.<br>Vanch district: Vanch settlement,<br>Jazgulom vil.<br>Shugnan district: Porshnev,<br>Sokhcharv vil.      |
|                       |                                                                                                                                                         | Central<br>Tajikistan                                            | Valley<br>Irrigated                  | Gissar district: Gornaja Khanaka,<br>Almosi vil.                                                                                                          |
|                       |                                                                                                                                                         |                                                                  | Foothills<br>Relatively<br>Irrigated | Faizabad district: Dubeda,<br>Miskinobod vil.                                                                                                             |
|                       |                                                                                                                                                         |                                                                  | Mountain<br>Irrigated                | Djirgital district: Ljakhsh, Pildon<br>vil.                                                                                                               |
|                       |                                                                                                                                                         | Southern<br>Tajikistan,<br>Khotlon<br>province                   | Mountain<br>Rainfed                  | Muminobod district: Gofilobod<br>and Shakhrak vil.<br>Shurabad district: Shurabad and<br>Dargistan vil.<br>Khovaling district: Paranak and<br>Novobod vil |
|                       |                                                                                                                                                         | 2                                                                | Pear<br>( <i>Pyrus</i> sp)           | Southeastern<br>Tajikistan                                                                                                                                |
| Mountain<br>Rainfed   | Muminobod district:<br>Childukhtaron, Chavzadara vil.<br>Khovalin district: Daraimullo,<br>Sangdara vil.<br>Shurabad district: Devdor,<br>Sulmabad vil. |                                                                  |                                      |                                                                                                                                                           |
| Central<br>Tajikistan | Valley Irrigated                                                                                                                                        |                                                                  |                                      | Gissar district: Zardolu vil.<br>Faizabad district: Takakhona vil.                                                                                        |

|   | <i>Crop/species</i>                                | <i>Region</i>               | <i>Agroecosystem</i>   | <i>Project sites</i>                                                                                                                                                                                                                                                         |
|---|----------------------------------------------------|-----------------------------|------------------------|------------------------------------------------------------------------------------------------------------------------------------------------------------------------------------------------------------------------------------------------------------------------------|
|   |                                                    |                             | Foothills<br>Irrigated | Rasht district: Khait, Navdi,<br>Dzhavr vil.<br>Nurabad district: Nurabad settl.<br>Djirgital district: Pildon, Gubai<br>vil.                                                                                                                                                |
|   |                                                    |                             | Mountain<br>Rainfed    | Rasht district: Khait,<br>Khazorchashma vil.<br>Nurabad district: Nurabad, Daraji<br>khakimi vil.<br>Djirgital district: Novabad.<br>Pildon; Sajron vil.                                                                                                                     |
|   |                                                    | Western Pamir<br>and Darvaz | Foothills<br>Irrigated | Vanch district: Rokhorv, Tekhavr,<br>Bunaj vil.<br>Shugnan district: Porshnev,<br>Sokhchavr vil.<br>Darvaz district: Kurgovat, Joged<br>vil.                                                                                                                                 |
|   |                                                    |                             | Mountain<br>Rainfed    | Vanch district: Dashtak,<br>Shurgovat vil.<br>Shugnan district: Buni, Dasht vil.<br>Darvaz district: Ruzvaj, Togmaj<br>vil.                                                                                                                                                  |
| 3 | <b>Apricot</b><br>( <i>Prunus armeniaca</i><br>L.) | Central<br>Tajikistan       | Valley<br>Irrigated    | Tursunzade district: Pakhtabad,<br>Chirkent, Batosh vil.<br>Gissar district: Mortepa, Kalai,<br>Khisor vil.<br>Vakhdat district: Zargar,<br>Dashtibed, Lakajbegi vil.                                                                                                        |
|   |                                                    |                             | Foothills<br>Irrigated | Faizabad district: Faizabad settl.,<br>Zardolukho vil.<br>Rasht district: Khait, Gubaj,<br>Novabad, Kalai Surkh, Nimich<br>vil.<br>Djirgital district, Pildon, Ljakhsh,<br>Karamyk, Sajron vil.<br>Tavildar district: Khazrati, Sulton,<br>Sagirdasht vil., Tavildora settl. |
|   |                                                    |                             | Mountain<br>Rainfed    | Faizabad district: Navgrez, Dola<br>vil.<br>Rasht district:<br>Kamarob, Kaznok, Shul vil.<br>Djirgital district, Ljakhsh, Sajron<br>vil., Chirgital settl.<br>Tavildar district: Mienadu vil.,<br>Jezgand valley.                                                            |

|   | <i>Crop/species</i>                          | <i>Region</i>                                       | <i>Agroecosystem</i> | <i>Project sites</i>                                                                                                                                                               |
|---|----------------------------------------------|-----------------------------------------------------|----------------------|------------------------------------------------------------------------------------------------------------------------------------------------------------------------------------|
|   |                                              | Northern Tajikistan, Sugd province                  | Valley Irrigated,    | Bobodzhon-Gafurov district: Kastakoz, Somgar, Unchi, Kulangir, Auchi-Kalachi, Ispisar, Rukhak vil.<br>Kanibadam district: Pulaton, Makhram, Karakchikum, Ravot, Kuchkak vil.       |
|   |                                              |                                                     | Foothills Irrigated  | Isfara district: Chorkukh, Chilgazi, Oftobru, Vorukh vil.<br>Asht district: Oshoba, Kamish-Kurgan, Pongoz, Boboiob vil.                                                            |
|   |                                              |                                                     | Mountain Irrigated   | Ayni district: Kazdan, Darg, Shamtuch, Varz, Rarz vil.<br>Gorno- Matchinsk district: Sabakh, Obburdan, Pastigal, Ustoshon vil.<br>Penjikent district: Margidar, Dashti, Malla vil. |
|   |                                              | Western Pamir, Gorno-Badakhshan autonomous province | Foothills Irrigated  | Vanch district: Jazgulem, Panchambeobod vil.<br>Rushan district: Vomar, Bardushon vil. (basin of Jazgulem and Bartang rivers).                                                     |
|   |                                              |                                                     | Mountain Irrigated   | Shugnan district: Sokhchavr, Porshnev vil.<br>Ishkoshim district: Shakh dara and Gund valley, Garmchashma vil.                                                                     |
| 4 | <b>Peach</b><br>( <i>Persica vulgaris</i> )  | Central Tajikistan                                  | Valley Irrigated     | Vakhdad district: Kupruk-Boshi, Turkobod, Simiganch, Zargar vil.<br>Rudaki district: Ljaur, Darjeobod, Esanboi vil.                                                                |
|   |                                              |                                                     | Foothills Irrigated  | Varzob district: Kandara, Takob vil.<br>Shakhrinav district: Chu zi, Khodzha Childier, Sangvor, Chiptura vil.                                                                      |
|   |                                              |                                                     | Mountain Rainfed     | Gissar district: Durbat, Almasi, Gornaja Khanaka, Sunbula vil.<br>Tursunzade district: Jangibog, Karatag, Pakhtabad vil.                                                           |
| 5 | <b>Sea buckthorn</b><br>( <i>Hippophae</i> ) | Western Pamir & Darvaz,                             | Foothills Rainfed    | Darvaz district: Vishkharv valley.                                                                                                                                                 |

|   | <i>Crop/species</i>                          | <i>Region</i>                             | <i>Agroecosystem</i>  | <i>Project sites</i>                                                                                                                                                                                                                                          |
|---|----------------------------------------------|-------------------------------------------|-----------------------|---------------------------------------------------------------------------------------------------------------------------------------------------------------------------------------------------------------------------------------------------------------|
|   | <i>rhamnoides)</i>                           | Gorno-Badakhshan autonomous province      | Mountain Rainfed      | Rasht district: Obi Khingou valley.<br>Ishkoshim district: Andorob valley.<br>Shugnan district: Pjandzh valley.<br>Vanch district: Vanch valley.                                                                                                              |
| 6 | <b>Grapevine</b><br>( <i>Vitis sp</i> )      | Southwestern Tajikistan, Khotlon province | Valley Irrigated      | Kulyab district: Jakhsu valley.                                                                                                                                                                                                                               |
|   |                                              |                                           | Foothills Rainfed     | Muminobod district: Tutkaul, Parazor vil.<br>Khovalinsk district: Kadakhi, Degrezien vil.<br>Kulyab district: Siraki, Dakhana vil.<br>Moscow district: Kurbon Shaid vil.<br>Chubek Vosey district: Ibrat vil.                                                 |
|   |                                              | Central Tajikistan                        | Foothills Irrigated   | Tursunzade district: Sharkent valley.<br>Shakhrinauz district: Karatag valley. Gissar district: Khanaka valley.<br>Rudaki district: Dariebod, Ozodi Zanon, Chortut, Chorjakkoron vil.<br>Varzob district: Varzob valley.                                      |
|   |                                              |                                           |                       |                                                                                                                                                                                                                                                               |
|   |                                              | Northern Tajikistan, Sugd province        | Valley Irrigated      | Bobodzhon-Gafurov district: Auchik-Kalachi, Ispisar, Kistakoz, Samgar, Undzhi vil.                                                                                                                                                                            |
|   |                                              |                                           | Foothills Irrigated   | Asht district: Pongoz, Kamish-Kurgan, Asht, Oshoba, Muborak vil.<br>Uratyube district: Suphoriph, Khavotag, Lakat, Rugunt vil.<br>Ganchi district: Eshankurgan, Gazanterak, Dalien vil.<br>Pendjikent district: Margidar, Dashti-Malla vil., Pendjikent town. |
| 7 | <b>Pistachio</b><br>( <i>Pistacia vera</i> ) | Southern Tajikistan, Khotlon province     | Foothills Not Rainfed | Pyandj district: Pyandj forestry, Burbulag, Kirovobod, Karatag plots.<br>Bokhtar district: Kurgan-Tube forestry, Toshabad plot.<br>Gazimalik district: forestry                                                                                               |

|              | <i>Crop/species</i>                | <i>Region</i>                                       | <i>Agroecosystem</i> | <i>Project sites</i>                                                                                                                                |
|--------------|------------------------------------|-----------------------------------------------------|----------------------|-----------------------------------------------------------------------------------------------------------------------------------------------------|
|              |                                    |                                                     |                      | named after A.Kholov,<br>Daganakiikskiy plot.                                                                                                       |
| 8            | Walnut<br>( <i>Juglans regia</i> ) | Central Tajikistan                                  | Valley Irrigated     | Gissar district: Kipchak, Kalayi Khisor vil.                                                                                                        |
|              |                                    |                                                     | Foothills Rainfed    | Rasht district: Khait and Kamarobu valleys.<br>Varzob district: Varzob gorge.<br>Tavildar district: Rabat, Jezgand vil.                             |
|              |                                    | Northern Tajikistan,<br>Sugd province               | Mountain Rainfed     | Ayni district: Sangiston, Zoosun vil.<br>Asht district: Shaidon, Pongoz, Punuk vil.<br>Gonno-Matchinskiy district: Podrokh, Postegav, Paldorak vil. |
|              |                                    |                                                     | Foothills Rainfed    | Asht district: Kamish-Kurgan, Muborak, Oshoba, Shajdon vil.                                                                                         |
|              |                                    | Western Pamir, Gorno-Badakhshan autonomous province | Foothills Irrigated  | Darvaz district: Viskharvi gorge, Viskharv vil., Kalaj-Khumb settl.                                                                                 |
|              |                                    |                                                     | Mountain Rainfed     | Vanch district: Shargovoi, Rovani, Andarbog, Vanch vil.<br>Rushan district: Bartang valley, Bartang, Dekh, Chadut, Basit, Barchadiv, Pastkhuph vil. |
| Turkmenistan |                                    |                                                     |                      |                                                                                                                                                     |
| 1            | Apple<br>( <i>Malus</i> sp)        | South–Western Kopetdag, Balkan province             | Mountain Rainfed     | Garrygala district: Garrygala forestry, Syunt-Khasardag, forest reserve, Khasar, Sjunt (Central site), Verhniy Sumbar.                              |
|              |                                    | Central Kopetdag, Akhal province                    | Mountain Rainfed     | Almalyk Gorge, Mesinev ridge, Gekdepe settlement.                                                                                                   |
|              |                                    |                                                     | Foothills Irrigated  | Geokdepe settlement, Annau settlement, Babarab settlement.                                                                                          |
| 2            | Pear<br>( <i>Pyrus</i> sp)         | South–Western Kopetdag, Balkan province             | Mountain Rainfed     | Garrygala district: Garrygala forestry.<br>Syunt-Khasardag forest reserve: Khasar, Sjunt (Central site), Verhniy Sumbar.                            |
|              |                                    | Central Kopetdag, Akhal province                    | Mountain Rainfed     | Gorge Almalyk, Mesinev ridge, Gekdepe settlement.                                                                                                   |



|   | <i>Crop/species</i>                                | <i>Region</i>                                     | <i>Agroecosystem</i>              | <i>Project sites</i>                                                                                                                                                                          |
|---|----------------------------------------------------|---------------------------------------------------|-----------------------------------|-----------------------------------------------------------------------------------------------------------------------------------------------------------------------------------------------|
|   |                                                    |                                                   | Foothills<br>Irrigated            | Geokdepe settlement,<br>Annau settlement, Babarab<br>settlement.                                                                                                                              |
|   |                                                    | Northern<br>Turkmenistan,<br>Dashoguz<br>province | Oasis<br>Irrigated                | Gorogly district: d/h <sup>1</sup> Zaman, d/h<br>named after Magtymkuli,<br>d/hBereket, d/h named after Kh.<br>Myradov.                                                                       |
|   |                                                    | Eastern<br>Turkmenistan,<br>Lebap province        | Oasis<br>Irrigated                | Atamurad district:<br>d/h named after O. Sokhbetova,<br>d/h Azatlyk, d/h Gyzyliak, d/h<br>Khalach.                                                                                            |
|   |                                                    | South-Eastern<br>Turkmenistan,<br>Mary province   | Oasis<br>Irrigated                | Elatan district: d/h English, d/h<br>Dostluk, d/h Rakhat, d/h Vatan.                                                                                                                          |
| 3 | <b>Grapevine</b><br>( <i>Vitis sp</i> )            | South–Western<br>Kopetdag,<br>Balkan province     | Mountain<br>Rainfed               | Sumbar river valley,<br>Garrygala settlement,<br>Chendyr valley.                                                                                                                              |
|   |                                                    | Central<br>Kopetdag,<br>Akhal province            | Valley<br>Irrigated               | Bakharden settlement, Geokcha<br>settlement, Akdashpayak<br>settlement, Geokdepe settlement,<br>Abadan settlement.                                                                            |
|   |                                                    | South-Eastern<br>Turkmenistan,<br>Mary province   | Oasis<br>Irrigated                | Elatan district:<br>d/h Sandykachi.                                                                                                                                                           |
| 4 | <b>Pomegranate</b><br>( <i>Punica granatum</i> )   | Central<br>Kopetdag,<br>Balkan province           | Mountain<br>Rainfed,<br>Irrigated | Chendir river valley,<br>Gorge Shikhbeder, d/h named<br>after Magtymkuli, d/h named<br>after Nijazov, Cumbar river<br>valley, Zerzau gorge, Etrek<br>district, d/h named after<br>Magtymkuli. |
| 5 | <b>Fig</b><br>( <i>Ficus carica</i> )              | South–Western<br>Kopetdag,<br>Balkan province     | Mountain<br>Rainfed               | Garrygala: Garrygala forestry,<br>Syunt-Khasardag forest reserve,<br>d/h Gergez, Chendir river valley,<br>d/h named after Nijazov.                                                            |
|   |                                                    | Bolshiyi<br>Balkhany,<br>Balkan province          | Mountain<br>Rainfed               | Gorge Byash Chashme.                                                                                                                                                                          |
| 6 | <b>Almond</b><br>( <i>Amygdalus<br/>communis</i> ) | Central<br>Kopetdag,<br>Akhal province            | Mountain<br>Rainfed               | Bakharly district: d/h Garovul.                                                                                                                                                               |

<sup>1</sup> d/h –Daikhan (or Dekhkan) Household is a legal entity that owns the land, plants, agricultural machinery, equipment and any other property required for production, processing and selling of the agricultural products. The Daikhan Household independently defines the scope of its activity and structure.

|            | <i>Crop/species</i>                         | <i>Region</i>                             | <i>Agroecosystem</i> | <i>Project sites</i>                                                                             |
|------------|---------------------------------------------|-------------------------------------------|----------------------|--------------------------------------------------------------------------------------------------|
|            |                                             | South–Western Kopetdag, Balkan province   | Mountain Rainfed     | Sumbar river valley, Palvansov, Aydere, Parkhai gorges.                                          |
| 7          | <b>Pistachio</b><br><i>(Pistacia vera)</i>  | South–Western Kopetdag, Balkan province   | Mountain Rainfed     | Palvansov, Shikhbeder, Gobasevut Gorges, Khaneg Vil., Garabag Vil., Temil Vil.                   |
|            |                                             | South-Eastern Turkmenistan, Mary province | Foothills Rainfed    | Kushka forest farm, Badkhiz forest reserve.                                                      |
|            |                                             | Eastern Turkmenistan, Lebap province      | Mountain Rainfed     | Goitendag district: d/h named after S.Nijazov, d/h Dostluk, d/h Azatlyk, d/h Goitendag.          |
| 8          | <b>Apricot</b><br><i>(Prunus armeniaca)</i> | Central Kopetdag, Akhal province          | Foothills Irrigated  | Akhal district: Bagir, Bakharden settlements.                                                    |
|            |                                             | South–Western Kopetdag, Balkan province   | Foothills Irrigated  | Garrygala district: d/h Daina, d/h Koine-Kasir.                                                  |
|            |                                             | Northern Turkmenistan, Dashoguz province  | Oasis Irrigated      | Gorogly district: d/h Abadanlyk, d/h Turkmenistan, d/h Jagtylyk, d/h named after Durdygylych.    |
|            |                                             | Eastern Turkmenistan, Lebap province      | Oasis Irrigated      | Sakar district: d/h Gulistan, d/h Lebap, d/h named after Seidi, d/h Vatan.                       |
|            |                                             | South-Eastern Turkmenistan, Mary province | Oasis Irrigated      | Mary district: d/h English, d/h Babadajkhan, d/h named after Azalov, d/h Ashgabat, d/h Khakykat. |
| 9          | <b>Alycha</b><br><i>(Prunus cerasifera)</i> | South–Western Kopetdag, Balkan province   | Foothills Rainfed    | Sumbar valley, Eldere, Aidere, Yuvandere gorges.                                                 |
|            |                                             | Northern Turkmenistan, Dashoguz province  | Oasis Irrigated      | Boldymzan district: d/h 10 jyl Abadanlyk, d/h Zakhmetkesh, d/h 27 Oktjabra.                      |
|            |                                             | Eastern Turkmenistan, Lebap province      | Oasis Irrigated      | Atamurat district: d/h Murzebeggala, d/h Azatlyk, d/h Gyzylajak.                                 |
| Uzbekistan |                                             |                                           |                      |                                                                                                  |

|   | <i>Crop/species</i>                        | <i>Region</i>                         | <i>Agroecosystem</i>                                               | <i>Project sites</i>                                                                                                                                                                          |
|---|--------------------------------------------|---------------------------------------|--------------------------------------------------------------------|-----------------------------------------------------------------------------------------------------------------------------------------------------------------------------------------------|
| 1 | <b>Apple</b><br>( <i>Malus sp</i> )        | Tashkent province                     | Mountain and foothills<br>Rainfed                                  | Karankulsay gorge, Parkentsay gorge<br>Bostanlyk district: Chimgan, Sidjak, Khumsan, Nanai, Bogustan villages<br>Parkent district: Parkent vil., Sukok vil.<br>Zarkent district: Zarkent vil. |
|   |                                            | Fergana valley                        | Foothills of Kuramin ridge in south-western Tian Shan<br>Irrigated | Abu-ali-ibn-sino forestry: Chadak village.<br>Kasan forestry: Kaspisai plot.                                                                                                                  |
|   |                                            |                                       | Foothills of Chatkal ridge in south-western Tian Shan<br>Irrigated | Namangan province:<br>Nanai district: Nanai village.                                                                                                                                          |
|   |                                            |                                       | Alai ridge<br>Rainfed                                              | Fergana province:<br>Cokh village.                                                                                                                                                            |
|   |                                            | Khorezm oasis                         | Oasis<br>Irrigated                                                 | Khazarasp district: Karvak vil., Ulugbek shirkat.<br>Khiva district: Irdinzan vil.<br>Khonka district: Karamazy vil.<br>Turtkul district: Shorakhon vil.                                      |
|   |                                            | Gissar ridge<br>Surkhandarya province | Mountain<br>Rainfed                                                | Sargirdag tract;<br>Denau district: Uzun forestry                                                                                                                                             |
| 2 | <b>Apricot</b> ( <i>Prunus armeniaca</i> ) | Gissar, Zeravshan, Nurata ridges      | Foothills<br>Irrigated                                             | Samarkand district:<br>Nekhrobod, Gulobod shirkat <sup>2</sup> .<br>Akdarya district: Amir Temur shirkat.                                                                                     |
|   |                                            | Syrkhandarya province                 | Foothills<br>Irrigated                                             | Baysun district: Baysun vil<br>Derbent district: Derbent vil.<br>Termez district: Manguzar vil., Angor district: Karasu settl.                                                                |
|   |                                            | Fergana valley, Fergana province      | Valley<br>Irrigated                                                | Kuvasay district: Kuvasay vil.<br>Vuadil district: Shakhimardan vil., Vuadil vil.                                                                                                             |

<sup>2</sup> Shirkat is a legal entity consisting of citizens voluntarily united on the share holding basis to produce agricultural products.

|   | <i>Crop/species</i>                            | <i>Region</i>                       | <i>Agroecosystem</i>                                               | <i>Project sites</i>                                                                                                                                                                          |
|---|------------------------------------------------|-------------------------------------|--------------------------------------------------------------------|-----------------------------------------------------------------------------------------------------------------------------------------------------------------------------------------------|
|   |                                                | Khorezm oasis                       | Oasis<br>Irrigated                                                 | Khazarasp district: Karvak vil.<br>Khonka district: Karamazy vil.<br>Turtkul district: Shorakhon vil.<br>Ellikkala district: Bogeb vil.                                                       |
|   |                                                | Bukhara province                    | Oasis<br>Irrigated                                                 | Vabkent district: Vabkent vil.<br>Romitan district: Romitan vil.<br>Bukhara district: Bukhara vil.                                                                                            |
| 3 | <b>Pear</b><br>( <i>Pyrus sp</i> )             | Tashkent province                   | Mountain/<br>Foothills<br>Rainfed                                  | Karankulsay gorge, Parkentsay gorge<br>Bostanlyk district: Chimgan, Sidjak, Khumsan, Nanai, Bogustan villages<br>Parkent district: Parkent vil., Sukok vil.<br>Zarkent district: Zarkent vil. |
|   |                                                | Khorezm oasis                       | Oasis<br>Irrigated                                                 | Khazarasp district: Karvak village,<br>Ulugbek shirkat.<br>Khiva district: Irдинzan vil.<br>Khonka district: Karamazy vil.                                                                    |
|   |                                                | Gissar ridge, Surkhandarya province | Mountain<br>Rainfed                                                | Uzun forestry, Sangardak tract, Tupolon river valley<br>Altyn district: Vakhshovar vil.<br>Saryasia district: Sangardak shirkat.<br>Uzun district: Khonariza shirkat.                         |
|   |                                                | Fergana valley, Namangan province   | Foothills of Chatkal ridge in south-western Tian Shan<br>Irrigated | Nanai district: Nanai vil.                                                                                                                                                                    |
| 4 | <b>Almond</b><br>( <i>Amygdalus communis</i> ) | Chatkal ridge                       | Mountain<br>Rainfed                                                | Burchmulla forestry: Khodjekent plot                                                                                                                                                          |
|   |                                                | Nurata ridge, Samarkand province    | Foothills<br>Rainfed                                               | Saraikurgan forestry: Plots # 1 and 2.                                                                                                                                                        |
|   |                                                | Gissar ridge                        | Mountain<br>Rainfed                                                | Kitap forestry: Kovzikhona plot.                                                                                                                                                              |
|   |                                                | Kuram ridge                         | Foothills                                                          | Akhangaran forestry: plots # 2 and 3.                                                                                                                                                         |

|   | <i>Crop/species</i>                          | <i>Region</i>                                                         | <i>Agroecosystem</i>                            | <i>Project sites</i>                                                                                                               |
|---|----------------------------------------------|-----------------------------------------------------------------------|-------------------------------------------------|------------------------------------------------------------------------------------------------------------------------------------|
| 5 | <b>Walnut</b><br>( <i>Juglans regia</i> )    | Chatkal, Ugam, Pskem ridges in south-western Tien-Shan mountain chain | Mountain and foothills<br>Rainfed               | Burchmulla Forestry: Sidjak vil., Khojent vil., Chigan vil.                                                                        |
|   |                                              | Nuratau ridge in Pamir–Alay mountain chain                            | Foothills<br>Rainfed                            | Nurata Nut species reserve, Farish forestry, Osmonsai settl., Madjarum, Khaist, Ukhum plots.                                       |
|   |                                              | Turkestan ridge in Pamir-Alay mountain chain                          | Mountain and foothills<br>Rainfed               | Bakhmal forestry: Bakhmal vil.                                                                                                     |
|   |                                              | Gissar ridge in, Pamir-Alay mountain chain                            | Mountain and foothills<br>Rainfed/irrigated     | Uzun forestry: Sangardar, Uzun, Denau tracts.                                                                                      |
| 6 | <b>Pistachio</b><br>( <i>Pistacia vera</i> ) | Babatag ridge in Pamir–Alay mountain chain, Surkhandarya province     | Mountain and foothills<br>Rainfed               | Babatag forestry: Dukhona vil., Chagam vil.                                                                                        |
|   |                                              | Nuratau ridge, Samarkand province                                     | Foothills<br>Rainfed                            | Saraykurgan forestry: plots # 1-4, Saraykurgan vil.                                                                                |
|   |                                              | Tashkent province                                                     | Mountain<br>Rainfed                             | Bostanlyk district: Karankulsai gorge                                                                                              |
| 7 | <b>Grapevine</b><br>( <i>Vitis sp</i> )      | Fergana valley                                                        | Valley<br>Irrigated                             | Andijon province: Markhamat vil., Balykchi vil.<br>Fergana province: Kuva district, Kuva vil.<br>Margilan district: Margilan town. |
|   |                                              | Tashkent province                                                     | Foothills<br>Rainfed/irrigated                  | Parkent district: Parkent vil., Sukok vil., Zarkent vil.                                                                           |
|   |                                              | Samarkand province                                                    | Foothills<br>Irrigated                          | Bulungur district: Bulungur vil., Urgut district: Urgut vil.<br>Tailyak district: Tailyak vil.                                     |
|   |                                              | Babatag ridge in Pamir -Alay mountain chain, Surkhandarya province    | Valley<br>Irrigated                             | Altyn district: Khondiza vil.                                                                                                      |
|   |                                              |                                                                       | Foothills (Valley of Tupolang river)<br>Rainfed | Uzun forestry: Uzun vil.                                                                                                           |

|   | <i>Crop/species</i>                              | <i>Region</i>                                                                            | <i>Agroecosystem</i> | <i>Project sites</i>                                                                                                                            |
|---|--------------------------------------------------|------------------------------------------------------------------------------------------|----------------------|-------------------------------------------------------------------------------------------------------------------------------------------------|
| 8 | <b>Pomegranate</b><br>( <i>Punica granatum</i> ) | Babatag ridge of Pamir -Alay mountain chain, spur of Gissar ridge, Surkhandarya province | Valley Irrigated     | Saraosie district: Dashnabad vil. Sherabad district: Sherabad vil. Termez district: Dostlik shirkat, Altyn district: Novabod shirkat, Aksu vil. |
|   |                                                  |                                                                                          | Mountain Rainfed     | Uzun forestry: Sangardar tract.                                                                                                                 |
|   |                                                  | Fergana valley, Fergana province                                                         | Valley Irrigated     | Kuva district: Kuva vil., Margilan district: Margilan town.                                                                                     |

**Table S2. Characteristics of Households (HH): crop, management space, country, agroecological zone, ethnic group and ecoregion**

| HH.ID | Crop      | Management Space | Country | Agroecological zone | Ethnic group | Ecoregion                         |
|-------|-----------|------------------|---------|---------------------|--------------|-----------------------------------|
| 1001  | Apple     | Orchard          | KAZ     | Almatay             | Uygur        | Tian Shan foothill arid steppe    |
| 1001  | Apricot   | Orchard          | KAZ     | Almatay             | Uygur        | Tian Shan foothill arid steppe    |
| 1001  | Grapevine | Orchard          | KAZ     | Almatay             | Uygur        | Tian Shan foothill arid steppe    |
| 1002  | Apple     | Orchard          | KAZ     | Almatay             | Kazakh       | Tian Shan montane conifer forests |
| 1003  | Apple     | Orchard          | KAZ     | Almatay             | Kazakh       | Tian Shan montane conifer forests |
| 1003  | Pear      | Orchard          | KAZ     | Almatay             | Kazakh       | Tian Shan montane conifer forests |
| 1005  | Apple     | Orchard          | KAZ     | Almatay             | Uygur        | Tian Shan foothill arid steppe    |
| 1005  | Apricot   | Orchard          | KAZ     | Almatay             | Uygur        | Tian Shan foothill arid steppe    |
| 1007  | Grapevine | Orchard          | KAZ     | South-Kazakhstan    | Kazakh       | Alai-Western Tian Shan steppe     |
| 1008  | Apple     | Home garden      | KAZ     | South-Kazakhstan    | Kazakh       | Alai-Western Tian Shan steppe     |
| 1009  | Apple     | Orchard          | KAZ     | Almatay             | Kazakh       | Central Asian northern desert     |
| 1009  | Pear      | Orchard          | KAZ     | Almatay             | Kazakh       | Central Asian northern desert     |
| 1010  | Apple     | Orchard          | KAZ     | South-Kazakhstan    | Russian      | Tian Shan foothill arid steppe    |
| 1010  | Pear      | Home garden      | KAZ     | South-Kazakhstan    | Russian      | Tian Shan foothill arid steppe    |
| 1011  | Apple     | Home garden      | KAZ     | Almatay             | Kazakh       | Central Asian northern desert     |
| 1011  | Apple     | Orchard          | KAZ     | Almatay             | Kazakh       | Central Asian northern desert     |

|      |           |             |     |                  |         |                                   |
|------|-----------|-------------|-----|------------------|---------|-----------------------------------|
| 1011 | Pear      | Orchard     | KAZ | Almatay          | Kazakh  | Central Asian northern desert     |
| 1012 | Grapevine | Orchard     | KAZ | South-Kazakhstan | Kazakh  | Alai-Western Tian Shan steppe     |
| 1013 | Apple     | Home garden | KAZ | Almatay          | Russian | Tian Shan montane conifer forests |
| 1014 | Apple     | Orchard     | KAZ | Almatay          | Kazakh  | Central Asian northern desert     |
| 1015 | Apple     | Orchard     | KAZ | Almatay          | Kazakh  | Central Asian northern desert     |
| 1016 | Apple     | Orchard     | KAZ | Almatay          | Kazakh  | Tian Shan foothill arid steppe    |
| 1017 | Apple     | Home garden | KAZ | Almatay          | Kazakh  | Tian Shan foothill arid steppe    |
| 1017 | Grapevine | Orchard     | KAZ | Almatay          | Kazakh  | Tian Shan foothill arid steppe    |
| 1018 | Grapevine | Orchard     | KAZ | South-Kazakhstan | Kazakh  | Gissaro-Alai open woodlands       |
| 1019 | Apple     | Orchard     | KAZ | Almatay          | Kazakh  | Tian Shan montane conifer forests |
| 1020 | Grapevine | Orchard     | KAZ | South-Kazakhstan | Kazakh  | Alai-Western Tian Shan steppe     |
| 1021 | Apricot   | Orchard     | KAZ | Almatay          | Uygur   | Tian Shan foothill arid steppe    |
| 1022 | Pear      | Orchard     | KAZ | Almatay          | Russian | Tian Shan montane conifer forests |
| 1023 | Apple     | Orchard     | KAZ | Almatay          | Uygur   | Tian Shan foothill arid steppe    |
| 1023 | Apricot   | Orchard     | KAZ | Almatay          | Uygur   | Tian Shan foothill arid steppe    |
| 1024 | Apple     | Orchard     | KAZ | Almatay          | Kazakh  | Central Asian northern desert     |
| 1025 | Grapevine | Orchard     | KAZ | South-Kazakhstan | Kazakh  | Alai-Western Tian Shan steppe     |
| 1026 | Apple     | Orchard     | KAZ | South-Kazakhstan | Kazakh  | Alai-Western Tian Shan steppe     |
| 1026 | Grapevine | Orchard     | KAZ | South-Kazakhstan | Kazakh  | Alai-Western Tian Shan steppe     |



|      |           |             |     |                  |         |                                   |
|------|-----------|-------------|-----|------------------|---------|-----------------------------------|
| 1027 | Apple     | Orchard     | KAZ | South-Kazakhstan | Russian | Alai-Western Tian Shan steppe     |
| 1027 | Apricot   | Orchard     | KAZ | South-Kazakhstan | Russian | Alai-Western Tian Shan steppe     |
| 1027 | Grapevine | Orchard     | KAZ | South-Kazakhstan | Russian | Alai-Western Tian Shan steppe     |
| 1027 | Pear      | Orchard     | KAZ | South-Kazakhstan | Russian | Alai-Western Tian Shan steppe     |
| 1028 | Apple     | Orchard     | KAZ | Almatay          | Kazakh  | Tian Shan foothill arid steppe    |
| 1028 | Apricot   | Orchard     | KAZ | Almatay          | Kazakh  | Tian Shan foothill arid steppe    |
| 1029 | Apple     | Home garden | KAZ | Almatay          | Uygur   | Tian Shan foothill arid steppe    |
| 1029 | Pear      | Home garden | KAZ | Almatay          | Uygur   | Tian Shan foothill arid steppe    |
| 1031 | Apple     | Orchard     | KAZ | Almatay          | Russian | Central Asian northern desert     |
| 1031 | Pear      | Orchard     | KAZ | Almatay          | Russian | Central Asian northern desert     |
| 1032 | Apple     | Orchard     | KAZ | Almatay          | Uygur   | Tian Shan foothill arid steppe    |
| 1032 | Grapevine | Orchard     | KAZ | Almatay          | Uygur   | Tian Shan foothill arid steppe    |
| 1033 | Apple     | Orchard     | KAZ | Almatay          | Kazakh  | Tian Shan foothill arid steppe    |
| 1033 | Apricot   | Orchard     | KAZ | Almatay          | Kazakh  | Tian Shan foothill arid steppe    |
| 1033 | Grapevine | Orchard     | KAZ | Almatay          | Kazakh  | Tian Shan foothill arid steppe    |
| 1033 | Pear      | Orchard     | KAZ | Almatay          | Kazakh  | Tian Shan foothill arid steppe    |
| 1034 | Apple     | Orchard     | KAZ | South-Kazakhstan | Kazakh  | Gissaro-Alai open woodlands       |
| 1035 | Apple     | Orchard     | KAZ |                  | Kazakh  | Gissaro-Alai open woodlands       |
| 1036 | Grapevine | Orchard     | KAZ | South-Kazakhstan | Kazakh  | Alai-Western Tian Shan steppe     |
| 1037 | Apple     | Orchard     | KAZ | Almatay          | Russian | Tian Shan montane conifer forests |

|      |           |                |     |                      |         |                                         |
|------|-----------|----------------|-----|----------------------|---------|-----------------------------------------|
| 1038 | Apple     | Orchard        | KAZ | Almatay              | Russian | Tian Shan<br>montane conifer<br>forests |
| 1038 | Pear      | Orchard        | KAZ | Almatay              | Russian | Tian Shan<br>montane conifer<br>forests |
| 1039 | Apricot   | Orchard        | KAZ | Almatay              | Uygur   | Tian Shan foothill<br>arid steppe       |
| 1040 | Grapevine | Orchard        | KAZ | South-<br>Kazakhstan | Uzbek   | Alai-Western Tian<br>Shan steppe        |
| 1041 | Apple     | Orchard        | KAZ | South-<br>Kazakhstan | Turkish | Tian Shan foothill<br>arid steppe       |
| 1041 | Pear      | Home<br>garden | KAZ | South-<br>Kazakhstan | Turkish | Tian Shan foothill<br>arid steppe       |
| 1042 | Apple     | Orchard        | KAZ | Almatay              | Russian | Central Asian<br>northern desert        |
| 1043 | Grapevine | Orchard        | KAZ | South-<br>Kazakhstan | Kazakh  | Alai-Western Tian<br>Shan steppe        |
| 1044 | Apple     | Orchard        | KAZ | Almatay              | Russian | Tian Shan<br>montane conifer<br>forests |
| 1045 | Apple     | Orchard        | KAZ | South-<br>Kazakhstan | Uzbek   | Alai-Western Tian<br>Shan steppe        |
| 1045 | Apricot   | Orchard        | KAZ | South-<br>Kazakhstan | Uzbek   | Alai-Western Tian<br>Shan steppe        |
| 1045 | Pear      | Orchard        | KAZ | South-<br>Kazakhstan | Uzbek   | Alai-Western Tian<br>Shan steppe        |
| 1046 | Apple     | Orchard        | KAZ | South-<br>Kazakhstan | Uzbek   | Gissaro-Alai open<br>woodlands          |
| 1046 | Apricot   | Orchard        | KAZ | South-<br>Kazakhstan | Uzbek   | Gissaro-Alai open<br>woodlands          |
| 1047 | Apple     | Orchard        | KAZ | Almatay              | Turkish | Tian Shan foothill<br>arid steppe       |
| 1048 | Apple     | Orchard        | KAZ | Almatay              | Turkish | Tian Shan<br>montane conifer<br>forests |
| 1048 | Pear      | Orchard        | KAZ | Almatay              | Turkish | Tian Shan<br>montane conifer<br>forests |
| 1049 | Apple     | Orchard        | KAZ | South-<br>Kazakhstan | Kazakh  | Alai-Western Tian<br>Shan steppe        |
| 1049 | Grapevine | Orchard        | KAZ | South-<br>Kazakhstan | Kazakh  | Alai-Western Tian<br>Shan steppe        |

|      |           |         |     |                  |         |                                   |
|------|-----------|---------|-----|------------------|---------|-----------------------------------|
| 1050 | Apricot   | Orchard | KAZ | South-Kazakhstan | Kazakh  | Alai-Western Tian Shan steppe     |
| 1050 | Grapevine | Orchard | KAZ | South-Kazakhstan | Kazakh  | Alai-Western Tian Shan steppe     |
| 1051 | Apple     | Orchard | KAZ | South-Kazakhstan | Uzbek   | Gissaro-Alai open woodlands       |
| 1051 | Pear      | Orchard | KAZ | South-Kazakhstan | Uzbek   | Gissaro-Alai open woodlands       |
| 1052 | Apple     | Orchard | KAZ | Almatay          | Uygur   | Tian Shan foothill arid steppe    |
| 1052 | Apricot   | Orchard | KAZ | Almatay          | Uygur   | Tian Shan foothill arid steppe    |
| 1052 | Grapevine | Orchard | KAZ | Almatay          | Uygur   | Tian Shan foothill arid steppe    |
| 1053 | Apple     | Orchard | KAZ | South-Kazakhstan | Kazakh  | Alai-Western Tian Shan steppe     |
| 1053 | Pear      | Orchard | KAZ | South-Kazakhstan | Kazakh  | Alai-Western Tian Shan steppe     |
| 1054 | Apple     | Orchard | KAZ | South-Kazakhstan | Uzbek   | Alai-Western Tian Shan steppe     |
| 1054 | Apricot   | Orchard | KAZ | South-Kazakhstan | Uzbek   | Alai-Western Tian Shan steppe     |
| 1054 | Pear      | Orchard | KAZ | South-Kazakhstan | Uzbek   | Alai-Western Tian Shan steppe     |
| 1055 | Apple     | Orchard | KAZ | Almatay          | Russian | Central Asian northern desert     |
| 1055 | Pear      | Orchard | KAZ | Almatay          | Russian | Central Asian northern desert     |
| 1056 | Apple     | Orchard | KAZ | Almatay          | Kazakh  | Central Asian northern desert     |
| 1056 | Pear      | Orchard | KAZ | Almatay          | Kazakh  | Central Asian northern desert     |
| 1057 | Apple     | Orchard | KAZ | Almatay          | Turkish | Tian Shan montane conifer forests |
| 1058 | Apple     | Orchard | KAZ | Almatay          | Kazakh  | Central Asian northern desert     |
| 1058 | Pear      | Orchard | KAZ | Almatay          | Kazakh  | Central Asian northern desert     |
| 1059 | Apple     | Orchard | KAZ | South-Kazakhstan | Kazakh  | Tian Shan foothill arid steppe    |

|      |           |             |     |                  |         |                                |
|------|-----------|-------------|-----|------------------|---------|--------------------------------|
| 1059 | Grapevine | Orchard     | KAZ | South-Kazakhstan | Kazakh  | Tian Shan foothill arid steppe |
| 1059 | Pear      | Orchard     | KAZ | South-Kazakhstan | Kazakh  | Tian Shan foothill arid steppe |
| 1060 | Apple     | Orchard     | KAZ | Almatay          | Kazakh  | Tian Shan foothill arid steppe |
| 1061 | Grapevine | Orchard     | KAZ | South-Kazakhstan | Kazakh  | Gissaro-Alai open woodlands    |
| 1062 | Apple     | Orchard     | KAZ | Almatay          | Uygur   | Tian Shan foothill arid steppe |
| 1063 | Grapevine | Orchard     | KAZ | Almatay          | Uygur   | Tian Shan foothill arid steppe |
| 1064 | Apple     | Orchard     | KAZ | South-Kazakhstan | Russian | Tian Shan foothill arid steppe |
| 1064 | Apricot   | Orchard     | KAZ | South-Kazakhstan | Russian | Tian Shan foothill arid steppe |
| 1064 | Pear      | Orchard     | KAZ | South-Kazakhstan | Russian | Tian Shan foothill arid steppe |
| 2001 | Apricot   | Home garden | KGZ | South Kyrgyzstan | Tajik   | Gissaro-Alai open woodlands    |
| 2002 | Apricot   | Home garden | KGZ | South Kyrgyzstan | Tajik   | Gissaro-Alai open woodlands    |
| 2003 | Apricot   | Home garden | KGZ | South Kyrgyzstan | Tajik   | Gissaro-Alai open woodlands    |
| 2004 | Apricot   | Home garden | KGZ | South Kyrgyzstan | Uzbek   | Gissaro-Alai open woodlands    |
| 2005 | Apricot   | Home garden | KGZ | South Kyrgyzstan | Tajik   | Gissaro-Alai open woodlands    |
| 2006 | Apricot   | Home garden | KGZ | South Kyrgyzstan | Tajik   | Gissaro-Alai open woodlands    |
| 2007 | Grapevine | Orchard     | KGZ | South Kyrgyzstan | Kyrgyz  | Gissaro-Alai open woodlands    |
| 2008 | Grapevine | Orchard     | KGZ |                  | Kyrgyz  | Gissaro-Alai open woodlands    |
| 2021 | Apple     | Home garden | KGZ | South Kyrgyzstan | Kyrgyz  | Gissaro-Alai open woodlands    |
| 2021 | Walnut    | Home garden | KGZ | South Kyrgyzstan | Kyrgyz  | Gissaro-Alai open woodlands    |
| 2021 | Walnut    | Orchard     | KGZ | South Kyrgyzstan | Kyrgyz  | Gissaro-Alai open woodlands    |
| 2022 | Apple     | Home garden | KGZ | South Kyrgyzstan | Kyrgyz  | Gissaro-Alai open woodlands    |

|      |        |             |     |                  |        |                                |
|------|--------|-------------|-----|------------------|--------|--------------------------------|
| 2022 | Walnut | Orchard     | KGZ | South Kyrgyzstan | Kyrgyz | Gissaro-Alai open woodlands    |
| 2023 | Apple  | Home garden | KGZ | South Kyrgyzstan | Kyrgyz | Gissaro-Alai open woodlands    |
| 2023 | Walnut | Orchard     | KGZ | South Kyrgyzstan | Kyrgyz | Gissaro-Alai open woodlands    |
| 2025 | Walnut | Orchard     | KGZ | South Kyrgyzstan | Kyrgyz | Gissaro-Alai open woodlands    |
| 2026 | Walnut | Orchard     | KGZ | South Kyrgyzstan | Kyrgyz | Gissaro-Alai open woodlands    |
| 2027 | Apple  | Home garden | KGZ | South Kyrgyzstan | Kyrgyz | Gissaro-Alai open woodlands    |
| 2027 | Walnut | Orchard     | KGZ | South Kyrgyzstan | Kyrgyz | Gissaro-Alai open woodlands    |
| 2028 | Apple  | Home garden | KGZ | South Kyrgyzstan | Uzbek  | Gissaro-Alai open woodlands    |
| 2028 | Walnut | Home garden | KGZ | South Kyrgyzstan | Uzbek  | Gissaro-Alai open woodlands    |
| 2028 | Walnut | Orchard     | KGZ | South Kyrgyzstan | Uzbek  | Gissaro-Alai open woodlands    |
| 2029 | Apple  | Home garden | KGZ | South Kyrgyzstan | Uzbek  | Gissaro-Alai open woodlands    |
| 2033 | Apple  | Home garden | KGZ | South Kyrgyzstan | Kyrgyz | Gissaro-Alai open woodlands    |
| 2033 | Walnut | Home garden | KGZ | South Kyrgyzstan | Kyrgyz | Gissaro-Alai open woodlands    |
| 2034 | Apple  | Home garden | KGZ | South Kyrgyzstan | Kyrgyz | Gissaro-Alai open woodlands    |
| 2034 | Walnut | Home garden | KGZ | North Kyrgyzstan | Kyrgyz | Gissaro-Alai open woodlands    |
| 2035 | Apple  | Home garden | KGZ | South Kyrgyzstan | Uzbek  | Gissaro-Alai open woodlands    |
| 2035 | Walnut | Home garden | KGZ | South Kyrgyzstan | Uzbek  | Gissaro-Alai open woodlands    |
| 2039 | Walnut | Home garden | KGZ | South Kyrgyzstan | Kyrgyz | Gissaro-Alai open woodlands    |
| 2040 | Walnut | Home garden | KGZ | South Kyrgyzstan | Kyrgyz | Gissaro-Alai open woodlands    |
| 2041 | Walnut | Home garden | KGZ | South Kyrgyzstan | Kyrgyz | Gissaro-Alai open woodlands    |
| 2047 | Apple  | Home garden | KGZ | North Kyrgyzstan | Kyrgyz | Tian Shan foothill arid steppe |

|      |         |             |     |                  |         |                                   |
|------|---------|-------------|-----|------------------|---------|-----------------------------------|
| 2048 | Apple   | Home garden | KGZ | North Kyrgyzstan | Kyrgyz  | Tian Shan foothill arid steppe    |
| 2049 | Apple   | Home garden | KGZ | North Kyrgyzstan | Kyrgyz  | Tian Shan foothill arid steppe    |
| 2050 | Currant | Home garden | KGZ | North Kyrgyzstan | Kyrgyz  | Tian Shan foothill arid steppe    |
| 2052 | Currant | Home garden | KGZ | North Kyrgyzstan | Kyrgyz  | Tian Shan foothill arid steppe    |
| 2053 | Apple   | Home garden | KGZ | North Kyrgyzstan | Russian | Tian Shan foothill arid steppe    |
| 2055 | Apple   | Home garden | KGZ | North Kyrgyzstan | Kyrgyz  | Tian Shan foothill arid steppe    |
| 2055 | Currant | Home garden | KGZ | North Kyrgyzstan | Kyrgyz  | Tian Shan foothill arid steppe    |
| 2056 | Apple   | Home garden | KGZ | North Kyrgyzstan | Kyrgyz  | Tian Shan foothill arid steppe    |
| 2057 | Apple   | Home garden | KGZ | North Kyrgyzstan | Kyrgyz  | Tian Shan foothill arid steppe    |
| 2057 | Currant | Home garden | KGZ | North Kyrgyzstan | Kyrgyz  | Tian Shan foothill arid steppe    |
| 2058 | Apple   | Home garden | KGZ | North Kyrgyzstan | Kyrgyz  | Tian Shan foothill arid steppe    |
| 2058 | Currant | Home garden | KGZ | North Kyrgyzstan | Kyrgyz  | Tian Shan foothill arid steppe    |
| 2059 | Apple   | Home garden | KGZ | North Kyrgyzstan | Kyrgyz  | Tian Shan foothill arid steppe    |
| 2059 | Currant | Home garden | KGZ | North Kyrgyzstan | Kyrgyz  | Tian Shan foothill arid steppe    |
| 2060 | Currant | Home garden | KGZ | North Kyrgyzstan | Kyrgyz  | Tian Shan foothill arid steppe    |
| 2061 | Apple   | Home garden | KGZ | North Kyrgyzstan | Russian | Tian Shan foothill arid steppe    |
| 2061 | Currant | Home garden | KGZ | North Kyrgyzstan | Russian | Tian Shan foothill arid steppe    |
| 2062 | Apple   | Home garden | KGZ | North Kyrgyzstan | Kyrgyz  | Tian Shan foothill arid steppe    |
| 2065 | Apple   | Home garden | KGZ | North Kyrgyzstan | Kyrgyz  | Tian Shan montane conifer forests |
| 2065 | Currant | Home garden | KGZ | North Kyrgyzstan | Kyrgyz  | Tian Shan montane conifer forests |

|      |           |             |     |                     |         |                                   |
|------|-----------|-------------|-----|---------------------|---------|-----------------------------------|
| 2067 | Apple     | Home garden | KGZ | North Kyrgyzstan    | Kyrgyz  | Tian Shan montane conifer forests |
| 2067 | Currant   | Home garden | KGZ | North Kyrgyzstan    | Kyrgyz  | Tian Shan montane conifer forests |
| 2068 | Currant   | Home garden | KGZ | North Kyrgyzstan    | Kyrgyz  | Tian Shan montane conifer forests |
| 2070 | Apple     | Home garden | KGZ | North Kyrgyzstan    | Russian | Tian Shan montane conifer forests |
| 2075 | Grapevine | Home garden | KGZ | North Kyrgyzstan    | Russian | Tian Shan foothill arid steppe    |
| 2076 | Grapevine | Home garden | KGZ | North Kyrgyzstan    | Russian | Tian Shan foothill arid steppe    |
| 2077 | Grapevine | Home garden | KGZ | North Kyrgyzstan    | Russian | Tian Shan foothill arid steppe    |
| 2078 | Grapevine | Home garden | KGZ | North Kyrgyzstan    | Russian | Tian Shan foothill arid steppe    |
| 2079 | Grapevine | Home garden | KGZ | North Kyrgyzstan    | Kyrgyz  | Tian Shan foothill arid steppe    |
| 2080 | Grapevine | Home garden | KGZ | North Kyrgyzstan    | Russian | Tian Shan foothill arid steppe    |
| 2081 | Grapevine | Home garden | KGZ | North Kyrgyzstan    | Kyrgyz  | Tian Shan foothill arid steppe    |
| 3001 | Grapevine | Home garden | TJK | Central Tajikistan  | Tajik   | Gissaro-Alai open woodlands       |
| 3001 | Grapevine | Orchard     | TJK | Central Tajikistan  | Tajik   | Gissaro-Alai open woodlands       |
| 3002 | Grapevine | Home garden | TJK | Central Tajikistan  | Tajik   | Gissaro-Alai open woodlands       |
| 3002 | Grapevine | Orchard     | TJK | Central Tajikistan  | Tajik   | Gissaro-Alai open woodlands       |
| 3003 | Apple     | Home garden | TJK | Central Tajikistan  | Tajik   | Pamir alpine desert and tundra    |
| 3004 | Apple     | Home garden | TJK | Central Tajikistan  | Tajik   | Gissaro-Alai open woodlands       |
| 3005 | Apple     | Home garden | TJK | Central Tajikistan  | Tajik   | Gissaro-Alai open woodlands       |
| 3006 | Pear      | Home garden | TJK | Northern Tajikistan | Tajik   | Gissaro-Alai open woodlands       |

|      |           |             |     |                     |       |                               |
|------|-----------|-------------|-----|---------------------|-------|-------------------------------|
| 3008 | Walnut    | Home garden | TJK | Northern Tajikistan | Tajik | Gissaro-Alai open woodlands   |
| 3010 | Apple     | Home garden | TJK | Northern Tajikistan | Tajik | Gissaro-Alai open woodlands   |
| 3011 | Apricot   | Home garden | TJK | Northern Tajikistan | Tajik | Gissaro-Alai open woodlands   |
| 3012 | Apple     | Home garden | TJK | Northern Tajikistan | Tajik | Gissaro-Alai open woodlands   |
| 3013 | Apricot   | Home garden | TJK | Northern Tajikistan | Tajik | Gissaro-Alai open woodlands   |
| 3014 | Pear      | Home garden | TJK | Central Tajikistan  | Tajik | Gissaro-Alai open woodlands   |
| 3015 | Pear      | Home garden | TJK | Central Tajikistan  | Tajik | Gissaro-Alai open woodlands   |
| 3016 | Pear      | Orchard     | TJK | Central Tajikistan  | Tajik | Gissaro-Alai open woodlands   |
| 3017 | Pear      | Home garden | TJK | Central Tajikistan  | Tajik | Gissaro-Alai open woodlands   |
| 3018 | Apple     | Orchard     | TJK | Central Tajikistan  | Tajik | Gissaro-Alai open woodlands   |
| 3019 | Apple     | Orchard     | TJK | Central Tajikistan  | Tajik | Gissaro-Alai open woodlands   |
| 3020 | Pear      | Home garden | TJK | Central Tajikistan  | Tajik | Gissaro-Alai open woodlands   |
| 3021 | Pear      | Home garden | TJK | Central Tajikistan  | Tajik | Gissaro-Alai open woodlands   |
| 3022 | Grapevine | Home garden | TJK | Central Tajikistan  | Tajik | Gissaro-Alai open woodlands   |
| 3023 | Grapevine | Home garden | TJK | Central Tajikistan  | Tajik | Gissaro-Alai open woodlands   |
| 3024 | Apple     | Home garden | TJK | Central Tajikistan  | Tajik | Alai-Western Tian Shan steppe |
| 3025 | Apple     | Home garden | TJK | Central Tajikistan  | Tajik | Gissaro-Alai open woodlands   |
| 3026 | Apricot   | Orchard     | TJK | Northern Tajikistan | Tajik | Alai-Western Tian Shan steppe |
| 3027 | Apricot   | Orchard     | TJK | Northern Tajikistan | Tajik | Gissaro-Alai open woodlands   |
| 3028 | Apple     | Home garden | TJK | Northern Tajikistan | Tajik | Gissaro-Alai open woodlands   |
| 3028 | Apple     | Orchard     | TJK | Northern Tajikistan | Tajik | Gissaro-Alai open woodlands   |



|      |             |             |     |                     |         |                                 |
|------|-------------|-------------|-----|---------------------|---------|---------------------------------|
| 3028 | Apricot     | Orchard     | TJK | Northern Tajikistan | Tajik   | Gissaro-Alai open woodlands     |
| 3029 | Apple       | Home garden | TJK | Northern Tajikistan | Tajik   | Gissaro-Alai open woodlands     |
| 3030 | Apricot     | Orchard     | TJK | Northern Tajikistan | Tajik   | Pamir alpine desert and tundra  |
| 3031 | Pear        | Orchard     | TJK | Northern Tajikistan | Tajik   | Pamir alpine desert and tundra  |
| 3032 | Pear        | Home garden | TJK | Northern Tajikistan | Tajik   | Pamir alpine desert and tundra  |
| 3033 | Walnut      | Home garden | TJK | Central Tajikistan  | Tajik   | Pamir alpine desert and tundra  |
| 3034 | Pear        | Home garden | TJK |                     | Tajik   | Pamir alpine desert and tundra  |
| 3035 | Pear        | Home garden | TJK | Central Tajikistan  | Tajik   | Pamir alpine desert and tundra  |
| 3036 | Walnut      | Home garden | TJK | Central Tajikistan  | Tajik   | Pamir alpine desert and tundra  |
| 3040 | Apple       | Home garden | TJK | Central Tajikistan  | Tajik   | Pamir alpine desert and tundra  |
| 3041 | Walnut      | Home garden | TJK | Central Tajikistan  | Tajik   | Pamir alpine desert and tundra  |
| 3043 | Walnut      | Home garden | TJK | Central Tajikistan  | Tajik   | Pamir alpine desert and tundra  |
| 3047 | Apple       | Orchard     | TJK | Central Tajikistan  | Tajik   | Pamir alpine desert and tundra  |
| 3047 | Apricot     | Orchard     | TJK | Central Tajikistan  | Tajik   | Pamir alpine desert and tundra  |
| 4001 | Pear        | Orchard     | TRM | Central Kopetdag    | Turkmen | Kopet Dag semi-desert           |
| 4002 | Pear        | Orchard     | TRM | Central Kopetdag    | Turkmen | Kopet Dag semi-desert           |
| 4003 | Apricot     | Orchard     | TRM | Central Kopetdag    | Turkmen | Kopet Dag semi-desert           |
| 4004 | Apricot     | Orchard     | TRM | Central Kopetdag    | Turkmen | Kopet Dag semi-desert           |
| 4005 | Cherry plum | Orchard     | TRM | South Turkmenistan  | Turkmen | Badghyz and Karabil semi-desert |
| 4006 | Apricot     | Orchard     | TRM | South Turkmenistan  | Turkmen | Badghyz and Karabil semi-desert |

|      |             |         |     |                    |         |                                  |
|------|-------------|---------|-----|--------------------|---------|----------------------------------|
| 4007 | Apricot     | Orchard | TRM | South Turkmenistan | Turkmen | Badghyz and Karabil semi-desert  |
| 4008 | Apricot     | Orchard | TRM | South Turkmenistan | Turkmen | Badghyz and Karabil semi-desert  |
| 4009 | Apricot     | Orchard | TRM | South Turkmenistan | Turkmen | Badghyz and Karabil semi-desert  |
| 4010 | Cherry plum | Orchard | TRM | South Turkmenistan | Turkmen | Badghyz and Karabil semi-desert  |
| 4011 | Apricot     | Orchard | TRM | North Turkmenistan | Turkmen | Central Asian riparian woodlands |
| 4012 | Pear        | Orchard | TRM | North Turkmenistan | Kazakh  | Central Asian riparian woodlands |
| 4014 | Cherry plum | Orchard | TRM | North Turkmenistan | Turkmen | Central Asian riparian woodlands |
| 4015 | Cherry plum | Orchard | TRM | North Turkmenistan | Turkmen | Central Asian riparian woodlands |
| 4017 | Apricot     | Orchard | TRM | East Turkmenistan  | Turkmen | Central Asian riparian woodlands |
| 4018 | Apricot     | Orchard | TRM | East Turkmenistan  | Turkmen | Central Asian riparian woodlands |
| 4019 | Cherry plum | Orchard | TRM | North Turkmenistan | Turkmen | Central Asian riparian woodlands |
| 4020 | Cherry plum | Orchard | TRM | East Turkmenistan  | Turkmen | Central Asian riparian woodlands |
| 4021 | Cherry plum | Orchard | TRM | East Turkmenistan  | Turkmen | Central Asian riparian woodlands |
| 4022 | Cherry plum | Orchard | TRM | East Turkmenistan  | Turkmen | Central Asian riparian woodlands |

|      |             |             |     |                   |         |                                       |
|------|-------------|-------------|-----|-------------------|---------|---------------------------------------|
| 4023 | Pear        | Orchard     | TRM | East Turkmenistan | Uzbek   | Central Asian riparian woodlands      |
| 4024 | Pear        | Orchard     | TRM | East Turkmenistan | Turkmen | Central Asian riparian woodlands      |
| 4025 | Almond      | Home garden | TRM | West Turkmenistan | Turkmen | Kopet Dag woodlands and forest steppe |
| 4028 | Almond      | Home garden | TRM | West Turkmenistan | Turkmen | Kopet Dag woodlands and forest steppe |
| 4029 | Almond      | Home garden | TRM | West Turkmenistan | Turkmen | Kopet Dag woodlands and forest steppe |
| 4030 | Almond      | Home garden | TRM | West Turkmenistan | Turkmen | Kopet Dag woodlands and forest steppe |
| 4033 | Almond      | Home garden | TRM | Central Kopetdag  | Turkmen | Kopet Dag semi-desert                 |
| 4046 | Pomegranate | Orchard     | TRM | West Kopetdag     | Turkmen | Kopet Dag woodlands and forest steppe |
| 4047 | Pomegranate | Orchard     | TRM | West Kopetdag     | Turkmen | Kopet Dag woodlands and forest steppe |
| 4048 | Pomegranate | Orchard     | TRM | West Kopetdag     | Turkmen | Kopet Dag woodlands and forest steppe |
| 4049 | Pomegranate | Home garden | TRM | West Kopetdag     | Turkmen | Kopet Dag woodlands and forest steppe |
| 4049 | Pomegranate | Orchard     | TRM | West Kopetdag     | Turkmen | Kopet Dag woodlands and forest steppe |
| 4052 | Apple       | Orchard     | TRM | West Kopetdag     | Turkmen | Kopet Dag woodlands and forest steppe |
| 4053 | Apple       | Orchard     | TRM | West Kopetdag     | Turkmen | Kopet Dag woodlands and forest steppe |

|      |       |         |     |                    |         |                                       |
|------|-------|---------|-----|--------------------|---------|---------------------------------------|
| 4054 | Apple | Orchard | TRM | West Kopetdag      | Turkmen | Kopet Dag woodlands and forest steppe |
| 4055 | Apple | Orchard | TRM | West Kopetdag      | Turkmen | Kopet Dag woodlands and forest steppe |
| 4056 | Apple | Orchard | TRM | Central Kopetdag   | Turkmen | Kopet Dag semi-desert                 |
| 4057 | Apple | Orchard | TRM | Central Kopetdag   | Turkmen | Kopet Dag semi-desert                 |
| 4058 | Apple | Orchard | TRM | Central Kopetdag   | Turkmen | Kopet Dag semi-desert                 |
| 4059 | Apple | Orchard | TRM | Central Kopetdag   | Turkmen | Kopet Dag semi-desert                 |
| 4060 | Apple | Orchard | TRM | Central Kopetdag   | Turkmen | Kopet Dag semi-desert                 |
| 4061 | Apple | Orchard | TRM | Central Kopetdag   | Turkmen | Kopet Dag semi-desert                 |
| 4062 | Apple | Orchard | TRM | South Turkmenistan | Turkmen | Badghyz and Karabil semi-desert       |
| 4063 | Apple | Orchard | TRM | South Turkmenistan | Turkmen | Badghyz and Karabil semi-desert       |
| 4064 | Apple | Orchard | TRM | North Turkmenistan | Turkmen | Central Asian riparian woodlands      |
| 4065 | Apple | Orchard | TRM | North Turkmenistan | Turkmen | Central Asian riparian woodlands      |
| 4066 | Apple | Orchard | TRM | East Turkmenistan  | Turkmen | Central Asian riparian woodlands      |
| 4067 | Apple | Orchard | TRM | East Turkmenistan  | Turkmen | Central Asian riparian woodlands      |
| 4068 | Apple | Orchard | TRM | East Turkmenistan  | Turkmen | Central Asian riparian woodlands      |
| 4069 | Apple | Orchard | TRM | East Turkmenistan  | Turkmen | Central Asian riparian woodlands      |

|      |             |             |     |                   |         |                                       |
|------|-------------|-------------|-----|-------------------|---------|---------------------------------------|
| 4070 | Apple       | Orchard     | TRM | East Turkmenistan | Turkmen | Central Asian riparian woodlands      |
| 4071 | Apple       | Orchard     | TRM | East Turkmenistan | Turkmen | Central Asian riparian woodlands      |
| 4072 | Cherry plum | Orchard     | TRM | West Kopetdag     | Turkmen | Kopet Dag woodlands and forest steppe |
| 4074 | Apricot     | Orchard     | TRM | West Kopetdag     | Turkmen | Kopet Dag woodlands and forest steppe |
| 4075 | Apricot     | Home garden | TRM | West Kopetdag     | Turkmen | Kopet Dag woodlands and forest steppe |
| 4078 | Pear        | Orchard     | TRM | West Kopetdag     | Turkmen | Kopet Dag woodlands and forest steppe |
| 4079 | Apricot     | Orchard     | TRM | Central Kopetdag  | Turkmen | Kopet Dag semi-desert                 |
| 4081 | Pear        | Orchard     | TRM | West Kopetdag     | Turkmen | Kopet Dag woodlands and forest steppe |
| 4082 | Cherry plum | Orchard     | TRM | West Kopetdag     | Turkmen | Kopet Dag woodlands and forest steppe |
| 4083 | Apricot     | Orchard     | TRM | Central Kopetdag  | Turkmen | Kopet Dag semi-desert                 |
| 4085 | Grapevine   | Orchard     | TRM | West Kopetdag     | Turkmen | Kopet Dag woodlands and forest steppe |
| 4086 | Grapevine   | Orchard     | TRM | West Kopetdag     | Turkmen | Kopet Dag woodlands and forest steppe |
| 4087 | Grapevine   | Orchard     | TRM | West Kopetdag     | Turkmen | Kopet Dag woodlands and forest steppe |
| 4088 | Grapevine   | Orchard     | TRM | West Kopetdag     | Turkmen | Kopet Dag woodlands and forest steppe |
| 4089 | Grapevine   | Orchard     | TRM | West Kopetdag     | Turkmen | Kopet Dag woodlands and forest steppe |

|      |             |             |     |                    |         |                                  |
|------|-------------|-------------|-----|--------------------|---------|----------------------------------|
| 4091 | Grapevine   | Home garden | TRM | Central Kopetdag   | Turkmen | Kopet Dag semi-desert            |
| 4091 | Grapevine   | Orchard     | TRM | Central Kopetdag   | Turkmen | Kopet Dag semi-desert            |
| 4092 | Grapevine   | Orchard     | TRM | Central Kopetdag   | Turkmen | Kopet Dag semi-desert            |
| 4093 | Grapevine   | Orchard     | TRM | Central Kopetdag   | Turkmen | Kopet Dag semi-desert            |
| 4094 | Grapevine   | Orchard     | TRM | South Turkmenistan | Turkmen | Badghyz and Karabil semi-desert  |
| 4095 | Grapevine   | Orchard     | TRM | South Turkmenistan | Turkmen | Badghyz and Karabil semi-desert  |
| 4096 | Grapevine   | Orchard     | TRM | North Turkmenistan | Turkmen | Central Asian riparian woodlands |
| 4097 | Grapevine   | Orchard     | TRM | North Turkmenistan | Turkmen | Central Asian riparian woodlands |
| 5001 | Apricot     | Home garden | UZB | Central Uzbekistan | Uzbek   | Central Asian southern desert    |
| 5001 | Grapevine   | Home garden | UZB | Central Uzbekistan | Uzbek   | Central Asian southern desert    |
| 5001 | Pomegranate | Home garden | UZB | Central Uzbekistan | Uzbek   | Central Asian southern desert    |
| 5002 | Pomegranate | Home garden | UZB | Central Uzbekistan | Uzbek   | Central Asian southern desert    |
| 5002 | Pomegranate | Orchard     | UZB | Central Uzbekistan | Uzbek   | Central Asian southern desert    |
| 5003 | Apricot     | Home garden | UZB | Central Uzbekistan | Uzbek   | Central Asian southern desert    |
| 5003 | Apricot     | Orchard     | UZB | Central Uzbekistan | Uzbek   | Central Asian southern desert    |
| 5003 | Grapevine   | Home garden | UZB | Central Uzbekistan | Uzbek   | Central Asian southern desert    |
| 5003 | Grapevine   | Orchard     | UZB | Central Uzbekistan | Uzbek   | Central Asian southern desert    |
| 5004 | Apricot     | Home garden | UZB | Central Uzbekistan | Uzbek   | Central Asian southern desert    |
| 5004 | Apricot     | Orchard     | UZB | Central Uzbekistan | Uzbek   | Central Asian southern desert    |

|      |             |             |     |                     |       |                                  |
|------|-------------|-------------|-----|---------------------|-------|----------------------------------|
| 5004 | Grapevine   | Home garden | UZB | Central Uzbekistan  | Uzbek | Central Asian southern desert    |
| 5004 | Grapevine   | Orchard     | UZB | Central Uzbekistan  | Uzbek | Central Asian southern desert    |
| 5004 | Pomegranate | Home garden | UZB | Central Uzbekistan  | Uzbek | Central Asian southern desert    |
| 5004 | Pomegranate | Orchard     | UZB | Central Uzbekistan  | Uzbek | Central Asian southern desert    |
| 5005 | Apricot     | Home garden | UZB | Central Uzbekistan  | Uzbek | Central Asian southern desert    |
| 5005 | Apricot     | Orchard     | UZB | Central Uzbekistan  | Uzbek | Central Asian southern desert    |
| 5006 | Pomegranate | Home garden | UZB | Central Uzbekistan  | Uzbek | Central Asian southern desert    |
| 5007 | Pomegranate | Home garden | UZB | Central Uzbekistan  | Uzbek | Central Asian southern desert    |
| 5008 | Apricot     | Home garden | UZB | Central Uzbekistan  | Uzbek | Central Asian southern desert    |
| 5008 | Apricot     | Orchard     | UZB | Central Uzbekistan  | Uzbek | Central Asian southern desert    |
| 5009 | Apricot     | Home garden | UZB | Central Uzbekistan  | Uzbek | Central Asian southern desert    |
| 5009 | Apricot     | Orchard     | UZB | Central Uzbekistan  | Uzbek | Central Asian southern desert    |
| 5009 | Grapevine   | Orchard     | UZB | Central Uzbekistan  | Uzbek | Central Asian southern desert    |
| 5010 | Apricot     | Home garden | UZB | Central Uzbekistan  | Uzbek | Central Asian southern desert    |
| 5010 | Apricot     | Orchard     | UZB | Central Uzbekistan  | Uzbek | Central Asian southern desert    |
| 5010 | Grapevine   | Home garden | UZB | Central Uzbekistan  | Uzbek | Central Asian southern desert    |
| 5010 | Grapevine   | Orchard     | UZB | Central Uzbekistan  | Uzbek | Central Asian southern desert    |
| 5010 | Pomegranate | Home garden | UZB | Central Uzbekistan  | Uzbek | Central Asian southern desert    |
| 5010 | Pomegranate | Orchard     | UZB | Central Uzbekistan  | Uzbek | Central Asian southern desert    |
| 5011 | Apricot     | Home garden | UZB | Northern Uzbekistan | Uzbek | Central Asian riparian woodlands |

|      |           |                |     |                        |       |                                        |
|------|-----------|----------------|-----|------------------------|-------|----------------------------------------|
| 5011 | Apricot   | Orchard        | UZB | Northern<br>Uzbekistan | Uzbek | Central Asian<br>riparian<br>woodlands |
| 5012 | Apricot   | Home<br>garden | UZB | Northern<br>Uzbekistan | Uzbek | Central Asian<br>riparian<br>woodlands |
| 5012 | Apricot   | Orchard        | UZB | Northern<br>Uzbekistan | Uzbek | Central Asian<br>riparian<br>woodlands |
| 5013 | Apricot   | Home<br>garden | UZB | Northern<br>Uzbekistan | Uzbek | Central Asian<br>riparian<br>woodlands |
| 5013 | Apricot   | Orchard        | UZB | Northern<br>Uzbekistan | Uzbek | Central Asian<br>riparian<br>woodlands |
| 5014 | Apricot   | Home<br>garden | UZB | Northern<br>Uzbekistan | Uzbek | Central Asian<br>riparian<br>woodlands |
| 5014 | Apricot   | Orchard        | UZB | Northern<br>Uzbekistan | Uzbek | Central Asian<br>riparian<br>woodlands |
| 5015 | Apricot   | Home<br>garden | UZB | Northern<br>Uzbekistan | Uzbek | Central Asian<br>riparian<br>woodlands |
| 5015 | Apricot   | Orchard        | UZB | Northern<br>Uzbekistan | Uzbek | Central Asian<br>riparian<br>woodlands |
| 5015 | Grapevine | Home<br>garden | UZB | Northern<br>Uzbekistan | Uzbek | Central Asian<br>riparian<br>woodlands |
| 5015 | Grapevine | Orchard        | UZB | Northern<br>Uzbekistan | Uzbek | Central Asian<br>riparian<br>woodlands |
| 5016 | Apricot   | Home<br>garden | UZB | Northern<br>Uzbekistan | Uzbek | Central Asian<br>southern desert       |
| 5016 | Apricot   | Orchard        | UZB | Northern<br>Uzbekistan | Uzbek | Central Asian<br>southern desert       |
| 5017 | Apricot   | Home<br>garden | UZB | Northern<br>Uzbekistan | Uzbek | Central Asian<br>southern desert       |
| 5017 | Apricot   | Orchard        | UZB | Northern<br>Uzbekistan | Uzbek | Central Asian<br>southern desert       |
| 5018 | Apricot   | Home<br>garden | UZB | Northern<br>Uzbekistan | Uzbek | Central Asian<br>southern desert       |



|      |         |             |     |                     |       |                                  |
|------|---------|-------------|-----|---------------------|-------|----------------------------------|
| 5018 | Apricot | Orchard     | UZB | Northern Uzbekistan | Uzbek | Central Asian southern desert    |
| 5019 | Apple   | Home garden | UZB | Northern Uzbekistan | Uzbek | Central Asian riparian woodlands |
| 5019 | Apple   | Orchard     | UZB | Northern Uzbekistan | Uzbek | Central Asian riparian woodlands |
| 5020 | Apple   | Home garden | UZB | Northern Uzbekistan | Uzbek | Central Asian riparian woodlands |
| 5020 | Apple   | Orchard     | UZB | Northern Uzbekistan | Uzbek | Central Asian riparian woodlands |
| 5021 | Apple   | Home garden | UZB | Northern Uzbekistan | Uzbek | Central Asian riparian woodlands |
| 5021 | Apple   | Orchard     | UZB | Northern Uzbekistan | Uzbek | Central Asian riparian woodlands |
| 5022 | Apple   | Home garden | UZB | Northern Uzbekistan | Uzbek | Central Asian riparian woodlands |
| 5022 | Apple   | Orchard     | UZB | Northern Uzbekistan | Uzbek | Central Asian riparian woodlands |
| 5023 | Apple   | Home garden | UZB | Northern Uzbekistan | Uzbek | Central Asian southern desert    |
| 5023 | Apple   | Orchard     | UZB | Northern Uzbekistan | Uzbek | Central Asian southern desert    |
| 5024 | Apple   | Home garden | UZB | Northern Uzbekistan | Uzbek | Central Asian southern desert    |
| 5024 | Apple   | Orchard     | UZB | Northern Uzbekistan | Uzbek | Central Asian southern desert    |
| 5025 | Apple   | Home garden | UZB | Northern Uzbekistan | Uzbek | Central Asian southern desert    |
| 5026 | Apple   | Home garden | UZB | Northern Uzbekistan | Uzbek | Central Asian southern desert    |
| 5026 | Apple   | Orchard     | UZB | Northern Uzbekistan | Uzbek | Central Asian southern desert    |
| 5027 | Apple   | Home garden | UZB | Northern Uzbekistan | Uzbek | Central Asian southern desert    |

|      |         |             |     |                     |       |                                  |
|------|---------|-------------|-----|---------------------|-------|----------------------------------|
| 5027 | Apple   | Orchard     | UZB | Northern Uzbekistan | Uzbek | Central Asian southern desert    |
| 5028 | Pear    | Home garden | UZB | Northern Uzbekistan | Uzbek | Central Asian riparian woodlands |
| 5028 | Pear    | Orchard     | UZB | Northern Uzbekistan | Uzbek | Central Asian riparian woodlands |
| 5029 | Pear    | Home garden | UZB | Northern Uzbekistan | Uzbek | Central Asian riparian woodlands |
| 5029 | Pear    | Orchard     | UZB | Northern Uzbekistan | Uzbek | Central Asian riparian woodlands |
| 5030 | Pear    | Home garden | UZB | Northern Uzbekistan | Uzbek | Central Asian southern desert    |
| 5031 | Pear    | Home garden | UZB | Northern Uzbekistan | Uzbek | Central Asian southern desert    |
| 5031 | Pear    | Orchard     | UZB | Northern Uzbekistan | Uzbek | Central Asian southern desert    |
| 5032 | Pear    | Home garden | UZB | Northern Uzbekistan | Uzbek | Central Asian southern desert    |
| 5033 | Apricot | Home garden | UZB | Northern Uzbekistan | Uzbek | Central Asian southern desert    |
| 5034 | Apricot | Home garden | UZB | Northern Uzbekistan | Uzbek | Central Asian southern desert    |
| 5035 | Apricot | Home garden | UZB | Northern Uzbekistan | Uzbek | Central Asian southern desert    |
| 5035 | Apricot | Orchard     | UZB | Northern Uzbekistan | Uzbek | Central Asian southern desert    |
| 5036 | Apricot | Home garden | UZB | Northern Uzbekistan | Uzbek | Central Asian riparian woodlands |
| 5036 | Apricot | Orchard     | UZB | Northern Uzbekistan | Uzbek | Central Asian riparian woodlands |
| 5037 | Apricot | Home garden | UZB | Northern Uzbekistan | Uzbek | Central Asian riparian woodlands |
| 5037 | Apricot | Orchard     | UZB | Northern Uzbekistan | Uzbek | Central Asian riparian woodlands |

|      |             |             |     |                     |       |                                  |
|------|-------------|-------------|-----|---------------------|-------|----------------------------------|
| 5038 | Apricot     | Home garden | UZB | Northern Uzbekistan | Uzbek | Central Asian riparian woodlands |
| 5038 | Apricot     | Orchard     | UZB | Northern Uzbekistan | Uzbek | Central Asian riparian woodlands |
| 5039 | Apple       | Home garden | UZB | Northern Uzbekistan | Uzbek | Central Asian southern desert    |
| 5039 | Apple       | Orchard     | UZB | Northern Uzbekistan | Uzbek | Central Asian southern desert    |
| 5039 | Apricot     | Home garden | UZB | Northern Uzbekistan | Uzbek | Central Asian southern desert    |
| 5039 | Apricot     | Orchard     | UZB | Northern Uzbekistan | Uzbek | Central Asian southern desert    |
| 5040 | Apple       | Home garden | UZB | Northern Uzbekistan | Uzbek | Central Asian southern desert    |
| 5040 | Apple       | Orchard     | UZB | Northern Uzbekistan | Uzbek | Central Asian southern desert    |
| 5040 | Apricot     | Home garden | UZB | Northern Uzbekistan | Uzbek | Central Asian southern desert    |
| 5040 | Apricot     | Orchard     | UZB | Northern Uzbekistan | Uzbek | Central Asian southern desert    |
| 5040 | Pomegranate | Home garden | UZB | Northern Uzbekistan | Uzbek | Central Asian southern desert    |
| 5040 | Pomegranate | Orchard     | UZB | Northern Uzbekistan | Uzbek | Central Asian southern desert    |
| 5041 | Apple       | Home garden | UZB | Northern Uzbekistan | Uzbek | Central Asian southern desert    |
| 5041 | Apple       | Orchard     | UZB | Northern Uzbekistan | Uzbek | Central Asian southern desert    |
| 5041 | Apricot     | Home garden | UZB | Northern Uzbekistan | Uzbek | Central Asian southern desert    |
| 5041 | Apricot     | Orchard     | UZB | Northern Uzbekistan | Uzbek | Central Asian southern desert    |
| 5042 | Apple       | Home garden | UZB | Northern Uzbekistan | Uzbek | Central Asian southern desert    |
| 5042 | Apple       | Orchard     | UZB | Northern Uzbekistan | Uzbek | Central Asian southern desert    |
| 5043 | Apple       | Home garden | UZB | Northern Uzbekistan | Uzbek | Central Asian southern desert    |
| 5043 | Apple       | Orchard     | UZB | Northern Uzbekistan | Uzbek | Central Asian southern desert    |

|      |           |             |     |                     |       |                                  |
|------|-----------|-------------|-----|---------------------|-------|----------------------------------|
| 5044 | Apple     | Orchard     | UZB | Northern Uzbekistan | Uzbek | Central Asian southern desert    |
| 5045 | Apple     | Home garden | UZB | Northern Uzbekistan | Uzbek | Central Asian southern desert    |
| 5045 | Apple     | Orchard     | UZB | Northern Uzbekistan | Uzbek | Central Asian southern desert    |
| 5046 | Apple     | Home garden | UZB | Northern Uzbekistan | Uzbek | Central Asian riparian woodlands |
| 5046 | Apple     | Orchard     | UZB | Northern Uzbekistan | Uzbek | Central Asian riparian woodlands |
| 5047 | Apple     | Home garden | UZB | Northern Uzbekistan | Uzbek | Central Asian southern desert    |
| 5047 | Apple     | Orchard     | UZB | Northern Uzbekistan | Uzbek | Central Asian southern desert    |
| 5048 | Apple     | Home garden | UZB | Northern Uzbekistan | Uzbek | Central Asian riparian woodlands |
| 5048 | Apple     | Orchard     | UZB | Northern Uzbekistan | Uzbek | Central Asian riparian woodlands |
| 5049 | Apple     | Home garden | UZB | Northern Uzbekistan | Uzbek | Central Asian riparian woodlands |
| 5050 | Grapevine | Home garden | UZB | Northern Uzbekistan | Uzbek | Central Asian southern desert    |
| 5051 | Apple     | Home garden | UZB | Northern Uzbekistan | Uzbek | Central Asian southern desert    |
| 5051 | Apple     | Orchard     | UZB | Northern Uzbekistan | Uzbek | Central Asian southern desert    |
| 5052 | Apple     | Home garden | UZB | Northern Uzbekistan | Uzbek | Central Asian southern desert    |
| 5052 | Apple     | Orchard     | UZB | Northern Uzbekistan | Uzbek | Central Asian southern desert    |
| 5053 | Apple     | Home garden | UZB | Northern Uzbekistan | Uzbek | Central Asian riparian woodlands |
| 5053 | Apple     | Orchard     | UZB | Northern Uzbekistan | Uzbek | Central Asian riparian woodlands |
| 5054 | Pear      | Home garden | UZB | Central Uzbekistan  | Uzbek | Alai-Western Tian Shan steppe    |

|      |           |             |     |                     |       |                                 |
|------|-----------|-------------|-----|---------------------|-------|---------------------------------|
| 5054 | Pear      | Orchard     | UZB | Central Uzbekistan  | Uzbek | Alai-Western Tian Shan steppe   |
| 5055 | Grapevine | Home garden | UZB | Central Uzbekistan  | Uzbek | Alai-Western Tian Shan steppe   |
| 5055 | Pear      | Home garden | UZB | Central Uzbekistan  | Uzbek | Alai-Western Tian Shan steppe   |
| 5055 | Pear      | Orchard     | UZB | Central Uzbekistan  | Uzbek | Alai-Western Tian Shan steppe   |
| 5056 | Grapevine | Home garden | UZB | Central Uzbekistan  | Uzbek | Alai-Western Tian Shan steppe   |
| 5056 | Grapevine | Orchard     | UZB | Central Uzbekistan  | Uzbek | Alai-Western Tian Shan steppe   |
| 5057 | Grapevine | Home garden | UZB | Central Uzbekistan  | Uzbek | Alai-Western Tian Shan steppe   |
| 5057 | Grapevine | Orchard     | UZB | Central Uzbekistan  | Uzbek | Alai-Western Tian Shan steppe   |
| 5058 | Grapevine | Home garden | UZB | Central Uzbekistan  | Uzbek | Gissaro-Alai open woodlands     |
| 5059 | Grapevine | Home garden | UZB | Central Uzbekistan  | Uzbek | Gissaro-Alai open woodlands     |
| 5059 | Grapevine | Orchard     | UZB | Central Uzbekistan  | Uzbek | Gissaro-Alai open woodlands     |
| 5060 | Grapevine | Home garden | UZB | Southern Uzbekistan | Uzbek | Alai-Western Tian Shan steppe   |
| 5060 | Grapevine | Orchard     | UZB | Southern Uzbekistan | Uzbek | Alai-Western Tian Shan steppe   |
| 5061 | Grapevine | Home garden | UZB | Southern Uzbekistan | Uzbek | Alai-Western Tian Shan steppe   |
| 5061 | Grapevine | Orchard     | UZB | Southern Uzbekistan | Uzbek | Alai-Western Tian Shan steppe   |
| 5062 | Grapevine | Home garden | UZB | Southern Uzbekistan | Tajik | Alai-Western Tian Shan steppe   |
| 5063 | Grapevine | Home garden | UZB | Southern Uzbekistan | Uzbek | Gissaro-Alai open woodlands     |
| 5064 | Grapevine | Home garden | UZB | Southern Uzbekistan | Uzbek | Gissaro-Alai open woodlands     |
| 5065 | Grapevine | Home garden | UZB | Southern Uzbekistan | Uzbek | Badghyz and Karabil semi-desert |
| 5065 | Grapevine | Orchard     | UZB | Southern Uzbekistan | Uzbek | Badghyz and Karabil semi-desert |

|      |           |             |     |                     |       |                               |
|------|-----------|-------------|-----|---------------------|-------|-------------------------------|
| 5066 | Grapevine | Home garden | UZB | Southern Uzbekistan | Uzbek | Gissaro-Alai open woodlands   |
| 5066 | Grapevine | Orchard     | UZB | Southern Uzbekistan | Uzbek | Gissaro-Alai open woodlands   |
| 5067 | Grapevine | Home garden | UZB | Southern Uzbekistan | Uzbek | Gissaro-Alai open woodlands   |
| 5067 | Grapevine | Orchard     | UZB | Southern Uzbekistan | Uzbek | Gissaro-Alai open woodlands   |
| 5068 | Grapevine | Home garden | UZB | Southern Uzbekistan | Uzbek | Gissaro-Alai open woodlands   |
| 5069 | Grapevine | Home garden | UZB | Southern Uzbekistan | Uzbek | Gissaro-Alai open woodlands   |
| 5070 | Grapevine | Home garden | UZB | Southern Uzbekistan | Uzbek | Alai-Western Tian Shan steppe |
| 5070 | Grapevine | Orchard     | UZB | Southern Uzbekistan | Uzbek | Alai-Western Tian Shan steppe |
| 5071 | Grapevine | Home garden | UZB | Southern Uzbekistan | Uzbek | Alai-Western Tian Shan steppe |
| 5071 | Grapevine | Orchard     | UZB | Southern Uzbekistan | Uzbek | Alai-Western Tian Shan steppe |
| 5072 | Grapevine | Home garden | UZB | Southern Uzbekistan | Uzbek | Alai-Western Tian Shan steppe |
| 5074 | Grapevine | Home garden | UZB | Southern Uzbekistan | Uzbek | Gissaro-Alai open woodlands   |
| 5075 | Grapevine | Home garden | UZB | Southern Uzbekistan | Uzbek | Gissaro-Alai open woodlands   |
| 5075 | Grapevine | Orchard     | UZB | Southern Uzbekistan | Uzbek | Gissaro-Alai open woodlands   |
| 5076 | Grapevine | Home garden | UZB | Southern Uzbekistan | Tajik | Gissaro-Alai open woodlands   |
| 5076 | Grapevine | Orchard     | UZB | Southern Uzbekistan | Tajik | Gissaro-Alai open woodlands   |
| 5077 | Grapevine | Home garden | UZB | Southern Uzbekistan | Uzbek | Gissaro-Alai open woodlands   |
| 5077 | Grapevine | Orchard     | UZB | Southern Uzbekistan | Uzbek | Gissaro-Alai open woodlands   |
| 5078 | Apricot   | Home garden | UZB | Southern Uzbekistan | Uzbek | Gissaro-Alai open woodlands   |
| 5078 | Apricot   | Orchard     | UZB | Southern Uzbekistan | Uzbek | Gissaro-Alai open woodlands   |
| 5079 | Apricot   | Home garden | UZB | Southern Uzbekistan | Uzbek | Gissaro-Alai open woodlands   |

|      |         |             |     |                     |       |                                 |
|------|---------|-------------|-----|---------------------|-------|---------------------------------|
| 5079 | Apricot | Orchard     | UZB | Southern Uzbekistan | Uzbek | Gissaro-Alai open woodlands     |
| 5080 | Apple   | Home garden | UZB | Southern Uzbekistan | Uzbek | Gissaro-Alai open woodlands     |
| 5080 | Apricot | Home garden | UZB | Southern Uzbekistan | Uzbek | Gissaro-Alai open woodlands     |
| 5080 | Apricot | Orchard     | UZB | Southern Uzbekistan | Uzbek | Gissaro-Alai open woodlands     |
| 5081 | Apple   | Home garden | UZB | Southern Uzbekistan | Uzbek | Gissaro-Alai open woodlands     |
| 5082 | Apple   | Home garden | UZB | Southern Uzbekistan | Tajik | Gissaro-Alai open woodlands     |
| 5082 | Pear    | Home garden | UZB | Southern Uzbekistan | Tajik | Gissaro-Alai open woodlands     |
| 5082 | Pear    | Orchard     | UZB | Southern Uzbekistan | Tajik | Gissaro-Alai open woodlands     |
| 5083 | Apricot | Home garden | UZB | Southern Uzbekistan | Uzbek | Badghyz and Karabil semi-desert |
| 5083 | Apricot | Orchard     | UZB | Southern Uzbekistan | Uzbek | Badghyz and Karabil semi-desert |
| 5084 | Apricot | Home garden | UZB | Southern Uzbekistan | Uzbek | Badghyz and Karabil semi-desert |
| 5084 | Apricot | Orchard     | UZB | Southern Uzbekistan | Uzbek | Badghyz and Karabil semi-desert |
| 5085 | Apricot | Home garden | UZB | Southern Uzbekistan | Uzbek | Badghyz and Karabil semi-desert |
| 5086 | Apricot | Home garden | UZB | Southern Uzbekistan | Uzbek | Badghyz and Karabil semi-desert |
| 5086 | Apricot | Orchard     | UZB | Southern Uzbekistan | Uzbek | Badghyz and Karabil semi-desert |
| 5087 | Apricot | Home garden | UZB | Southern Uzbekistan | Uzbek | Badghyz and Karabil semi-desert |
| 5087 | Apricot | Orchard     | UZB | Southern Uzbekistan | Uzbek | Badghyz and Karabil semi-desert |

|      |             |             |     |                     |       |                                 |
|------|-------------|-------------|-----|---------------------|-------|---------------------------------|
| 5088 | Apricot     | Home garden | UZB | Southern Uzbekistan | Tajik | Badghyz and Karabil semi-desert |
| 5088 | Apricot     | Orchard     | UZB | Southern Uzbekistan | Tajik | Badghyz and Karabil semi-desert |
| 5089 | Pomegranate | Home garden | UZB | Southern Uzbekistan | Uzbek | Badghyz and Karabil semi-desert |
| 5089 | Pomegranate | Orchard     | UZB | Southern Uzbekistan | Uzbek | Badghyz and Karabil semi-desert |
| 5090 | Apricot     | Home garden | UZB | Southern Uzbekistan | Uzbek | Badghyz and Karabil semi-desert |
| 5091 | Pomegranate | Home garden | UZB | Southern Uzbekistan | Uzbek | Badghyz and Karabil semi-desert |
| 5091 | Pomegranate | Orchard     | UZB | Southern Uzbekistan | Uzbek | Badghyz and Karabil semi-desert |
| 5092 | Pomegranate | Home garden | UZB | Southern Uzbekistan | Uzbek | Badghyz and Karabil semi-desert |
| 5092 | Pomegranate | Orchard     | UZB | Southern Uzbekistan | Uzbek | Badghyz and Karabil semi-desert |
| 5094 | Apple       | Home garden | UZB | Central Uzbekistan  | Uzbek | Gissaro-Alai open woodlands     |
| 5094 | Pear        | Home garden | UZB | Central Uzbekistan  | Uzbek | Gissaro-Alai open woodlands     |
| 5095 | Apple       | Home garden | UZB | Central Uzbekistan  | Uzbek | Gissaro-Alai open woodlands     |
| 5096 | Apple       | Home garden | UZB | Central Uzbekistan  | Uzbek | Gissaro-Alai open woodlands     |
| 5096 | Apple       | Orchard     | UZB | Central Uzbekistan  | Uzbek | Gissaro-Alai open woodlands     |
| 5097 | Almond      | Home garden | UZB | Central Uzbekistan  | Uzbek | Gissaro-Alai open woodlands     |
| 5098 | Almond      | Home garden | UZB | Central Uzbekistan  | Uzbek | Gissaro-Alai open woodlands     |
| 5098 | Pear        | Home garden | UZB | Central Uzbekistan  | Uzbek | Gissaro-Alai open woodlands     |



|      |        |             |     |                    |       |                             |
|------|--------|-------------|-----|--------------------|-------|-----------------------------|
| 5098 | Walnut | Home garden | UZB | Central Uzbekistan | Uzbek | Gissaro-Alai open woodlands |
| 5099 | Apple  | Home garden | UZB | Central Uzbekistan | Uzbek | Gissaro-Alai open woodlands |
| 5099 | Pear   | Home garden | UZB | Central Uzbekistan | Uzbek | Gissaro-Alai open woodlands |
| 5099 | Pear   | Orchard     | UZB | Central Uzbekistan | Uzbek | Gissaro-Alai open woodlands |
| 5100 | Apple  | Home garden | UZB | Central Uzbekistan | Tajik | Gissaro-Alai open woodlands |
| 5101 | Pear   | Home garden | UZB | Central Uzbekistan | Tajik | Gissaro-Alai open woodlands |
| 5102 | Apple  | Home garden | UZB | Central Uzbekistan | Tajik | Gissaro-Alai open woodlands |
| 5102 | Pear   | Home garden | UZB | Central Uzbekistan | Tajik | Gissaro-Alai open woodlands |
| 5102 | Walnut | Home garden | UZB | Central Uzbekistan | Tajik | Gissaro-Alai open woodlands |
| 5103 | Apple  | Home garden | UZB | Central Uzbekistan | Tajik | Gissaro-Alai open woodlands |
| 5103 | Pear   | Home garden | UZB | Central Uzbekistan | Tajik | Gissaro-Alai open woodlands |
| 5103 | Pear   | Orchard     | UZB | Central Uzbekistan | Tajik | Gissaro-Alai open woodlands |
| 5103 | Walnut | Home garden | UZB | Central Uzbekistan | Tajik | Gissaro-Alai open woodlands |
| 5104 | Apple  | Home garden | UZB | Central Uzbekistan | Tajik | Gissaro-Alai open woodlands |
| 5104 | Apple  | Orchard     | UZB | Central Uzbekistan | Tajik | Gissaro-Alai open woodlands |
| 5104 | Pear   | Home garden | UZB | Central Uzbekistan | Tajik | Gissaro-Alai open woodlands |
| 5104 | Pear   | Orchard     | UZB | Central Uzbekistan | Tajik | Gissaro-Alai open woodlands |
| 5105 | Apple  | Home garden | UZB | Central Uzbekistan | Tajik | Gissaro-Alai open woodlands |
| 5105 | Apple  | Orchard     | UZB | Central Uzbekistan | Tajik | Gissaro-Alai open woodlands |
| 5105 | Walnut | Home garden | UZB | Central Uzbekistan | Tajik | Gissaro-Alai open woodlands |
| 5106 | Apple  | Home garden | UZB | Central Uzbekistan | Tajik | Gissaro-Alai open woodlands |

|      |           |             |     |                    |       |                             |
|------|-----------|-------------|-----|--------------------|-------|-----------------------------|
| 5107 | Walnut    | Home garden | UZB | Central Uzbekistan | Tajik | Gissaro-Alai open woodlands |
| 5108 | Apple     | Home garden | UZB | Central Uzbekistan | Tajik | Gissaro-Alai open woodlands |
| 5108 | Apple     | Orchard     | UZB | Central Uzbekistan | Tajik | Gissaro-Alai open woodlands |
| 5109 | Apple     | Home garden | UZB | Central Uzbekistan | Tajik | Gissaro-Alai open woodlands |
| 5109 | Walnut    | Home garden | UZB | Central Uzbekistan | Tajik | Gissaro-Alai open woodlands |
| 5111 | Grapevine | Home garden | UZB | Central Uzbekistan | Tajik | Gissaro-Alai open woodlands |
| 5111 | Grapevine | Orchard     | UZB | Central Uzbekistan | Tajik | Gissaro-Alai open woodlands |
| 5112 | Apple     | Home garden | UZB | Central Uzbekistan | Tajik | Gissaro-Alai open woodlands |
| 5112 | Grapevine | Home garden | UZB | Central Uzbekistan | Tajik | Gissaro-Alai open woodlands |
| 5113 | Apple     | Orchard     | UZB | Central Uzbekistan | Tajik | Gissaro-Alai open woodlands |
| 5113 | Grapevine | Home garden | UZB | Central Uzbekistan | Tajik | Gissaro-Alai open woodlands |
| 5113 | Grapevine | Orchard     | UZB | Central Uzbekistan | Tajik | Gissaro-Alai open woodlands |
| 5114 | Apple     | Home garden | UZB | Central Uzbekistan | Tajik | Gissaro-Alai open woodlands |
| 5114 | Apple     | Orchard     | UZB | Central Uzbekistan | Tajik | Gissaro-Alai open woodlands |
| 5114 | Grapevine | Home garden | UZB | Central Uzbekistan | Tajik | Gissaro-Alai open woodlands |
| 5114 | Grapevine | Orchard     | UZB | Central Uzbekistan | Tajik | Gissaro-Alai open woodlands |
| 5115 | Almond    | Home garden | UZB | Central Uzbekistan | Uzbek | Gissaro-Alai open woodlands |
| 5115 | Walnut    | Home garden | UZB | Central Uzbekistan | Uzbek | Gissaro-Alai open woodlands |
| 5116 | Almond    | Home garden | UZB | Central Uzbekistan | Uzbek | Gissaro-Alai open woodlands |
| 5116 | Apple     | Home garden | UZB | Central Uzbekistan | Uzbek | Gissaro-Alai open woodlands |
| 5116 | Pear      | Home garden | UZB | Central Uzbekistan | Uzbek | Gissaro-Alai open woodlands |

|      |             |             |     |                     |       |                                 |
|------|-------------|-------------|-----|---------------------|-------|---------------------------------|
| 5116 | Pear        | Orchard     | UZB | Central Uzbekistan  | Uzbek | Gissaro-Alai open woodlands     |
| 5116 | Walnut      | Home garden | UZB | Central Uzbekistan  | Uzbek | Gissaro-Alai open woodlands     |
| 5117 | Apple       | Home garden | UZB | Central Uzbekistan  | Uzbek | Gissaro-Alai open woodlands     |
| 5117 | Walnut      | Home garden | UZB | Central Uzbekistan  | Uzbek | Gissaro-Alai open woodlands     |
| 5118 | Walnut      | Home garden | UZB | Central Uzbekistan  | Uzbek | Gissaro-Alai open woodlands     |
| 5119 | Apple       | Home garden | UZB | Central Uzbekistan  | Uzbek | Gissaro-Alai open woodlands     |
| 5119 | Pear        | Home garden | UZB | Central Uzbekistan  | Uzbek | Gissaro-Alai open woodlands     |
| 5119 | Walnut      | Home garden | UZB | Central Uzbekistan  | Uzbek | Gissaro-Alai open woodlands     |
| 5120 | Apple       | Home garden | UZB | Central Uzbekistan  | Uzbek | Gissaro-Alai open woodlands     |
| 5120 | Pear        | Home garden | UZB | Central Uzbekistan  | Uzbek | Gissaro-Alai open woodlands     |
| 5120 | Pear        | Orchard     | UZB | Central Uzbekistan  | Uzbek | Gissaro-Alai open woodlands     |
| 5127 | Pear        | Home garden | UZB | Southern Uzbekistan | Tajik | Gissaro-Alai open woodlands     |
| 5129 | Pomegranate | Home garden | UZB | Southern Uzbekistan | Uzbek | Badghyz and Karabil semi-desert |
| 5129 | Pomegranate | Orchard     | UZB | Southern Uzbekistan | Uzbek | Badghyz and Karabil semi-desert |
| 5130 | Grapevine   | Home garden | UZB | Southern Uzbekistan | Uzbek | Badghyz and Karabil semi-desert |
| 5130 | Grapevine   | Orchard     | UZB | Southern Uzbekistan | Uzbek | Badghyz and Karabil semi-desert |
| 5131 | Grapevine   | Home garden | UZB | Southern Uzbekistan | Uzbek | Badghyz and Karabil semi-desert |
| 5132 | Apple       | Home garden | UZB | Southern Uzbekistan | Uzbek | Badghyz and Karabil semi-desert |

|      |           |             |     |                     |       |                                 |
|------|-----------|-------------|-----|---------------------|-------|---------------------------------|
| 5132 | Apple     | Orchard     | UZB | Southern Uzbekistan | Uzbek | Badghyz and Karabil semi-desert |
| 5133 | Grapevine | Home garden | UZB | Southern Uzbekistan | Uzbek | Badghyz and Karabil semi-desert |
| 5138 | Almond    | Home garden | UZB | Central Uzbekistan  | Uzbek | Alai-Western Tian Shan steppe   |
| 5138 | Almond    | Orchard     | UZB | Central Uzbekistan  | Uzbek | Alai-Western Tian Shan steppe   |
| 5139 | Almond    | Home garden | UZB | Central Uzbekistan  | Uzbek | Alai-Western Tian Shan steppe   |
| 5141 | Walnut    | Home garden | UZB | Central Uzbekistan  | Uzbek | Alai-Western Tian Shan steppe   |
| 5142 | Walnut    | Home garden | UZB | Central Uzbekistan  | Uzbek | Alai-Western Tian Shan steppe   |
| 5143 | Walnut    | Home garden | UZB | Central Uzbekistan  | Uzbek | Gissaro-Alai open woodlands     |
| 5144 | Walnut    | Home garden | UZB | Central Uzbekistan  | Uzbek | Gissaro-Alai open woodlands     |
| 5145 | Grapevine | Home garden | UZB | Fergana Valley      | Tajik | Gissaro-Alai open woodlands     |
| 5145 | Grapevine | Orchard     | UZB | Fergana Valley      | Tajik | Gissaro-Alai open woodlands     |
| 5146 | Apple     | Orchard     | UZB | Fergana Valley      | Uzbek | Gissaro-Alai open woodlands     |
| 5146 | Apricot   | Home garden | UZB | Fergana Valley      | Uzbek | Gissaro-Alai open woodlands     |
| 5147 | Grapevine | Home garden | UZB | Fergana Valley      | Uzbek | Gissaro-Alai open woodlands     |
| 5147 | Grapevine | Orchard     | UZB | Fergana Valley      | Uzbek | Gissaro-Alai open woodlands     |
| 5148 | Apple     | Home garden | UZB | Fergana Valley      | Uzbek | Gissaro-Alai open woodlands     |
| 5148 | Apple     | Orchard     | UZB | Fergana Valley      | Uzbek | Gissaro-Alai open woodlands     |
| 5149 | Pear      | Orchard     | UZB | Fergana Valley      | Uzbek | Gissaro-Alai open woodlands     |
| 5150 | Apple     | Home garden | UZB | Fergana Valley      | Uzbek | Gissaro-Alai open woodlands     |
| 5150 | Apple     | Orchard     | UZB | Fergana Valley      | Uzbek | Gissaro-Alai open woodlands     |

|      |             |             |     |                |        |                               |
|------|-------------|-------------|-----|----------------|--------|-------------------------------|
| 5151 | Apple       | Orchard     | UZB | Fergana Valley | Uzbek  | Gissaro-Alai open woodlands   |
| 5151 | Pear        | Orchard     | UZB | Fergana Valley | Uzbek  | Gissaro-Alai open woodlands   |
| 5152 | Apple       | Orchard     | UZB | Fergana Valley | Uzbek  | Gissaro-Alai open woodlands   |
| 5153 | Grapevine   | Home garden | UZB | Fergana Valley | Uzbek  | Alai-Western Tian Shan steppe |
| 5154 | Apple       | Home garden | UZB | Fergana Valley | Uzbek  | Gissaro-Alai open woodlands   |
| 5155 | Apple       | Home garden | UZB | Fergana Valley | Uzbek  | Gissaro-Alai open woodlands   |
| 5155 | Pear        | Home garden | UZB | Fergana Valley | Uzbek  | Gissaro-Alai open woodlands   |
| 5156 | Apple       | Home garden | UZB | Fergana Valley | Uzbek  | Gissaro-Alai open woodlands   |
| 5157 | Grapevine   | Home garden | UZB | Fergana Valley | Uzbek  | Alai-Western Tian Shan steppe |
| 5158 | Apricot     | Home garden | UZB | Fergana Valley | Kyrgyz | Alai-Western Tian Shan steppe |
| 5158 | Grapevine   | Orchard     | UZB | Fergana Valley | Kyrgyz | Alai-Western Tian Shan steppe |
| 5159 | Apricot     | Home garden | UZB | Fergana Valley | Kyrgyz | Gissaro-Alai open woodlands   |
| 5160 | Apple       | Home garden | UZB | Fergana Valley | Uzbek  | Gissaro-Alai open woodlands   |
| 5161 | Apricot     | Home garden | UZB | Fergana Valley | Uzbek  | Alai-Western Tian Shan steppe |
| 5161 | Grapevine   | Home garden | UZB | Fergana Valley | Uzbek  | Alai-Western Tian Shan steppe |
| 5162 | Apricot     | Orchard     | UZB | Fergana Valley | Uzbek  | Gissaro-Alai open woodlands   |
| 5162 | Pomegranate | Home garden | UZB | Fergana Valley | Uzbek  | Gissaro-Alai open woodlands   |
| 5163 | Pomegranate | Home garden | UZB | Fergana Valley | Uzbek  | Gissaro-Alai open woodlands   |
| 5164 | Apricot     | Home garden | UZB | Fergana Valley | Uzbek  | Alai-Western Tian Shan steppe |
| 5165 | Apricot     | Home garden | UZB | Fergana Valley | Uzbek  | Gissaro-Alai open woodlands   |
| 5165 | Grapevine   | Home garden | UZB | Fergana Valley | Uzbek  | Gissaro-Alai open woodlands   |

|      |             |             |     |                |        |                               |
|------|-------------|-------------|-----|----------------|--------|-------------------------------|
| 5166 | Apricot     | Home garden | UZB | Fergana Valley | Kyrgyz | Alai-Western Tian Shan steppe |
| 5166 | Grapevine   | Orchard     | UZB | Fergana Valley | Kyrgyz | Alai-Western Tian Shan steppe |
| 5167 | Apple       | Orchard     | UZB | Fergana Valley | Uzbek  | Gissaro-Alai open woodlands   |
| 5167 | Pear        | Home garden | UZB | Fergana Valley | Uzbek  | Gissaro-Alai open woodlands   |
| 5168 | Apple       | Home garden | UZB | Fergana Valley | Uzbek  | Gissaro-Alai open woodlands   |
| 5168 | Pear        | Home garden | UZB | Fergana Valley | Uzbek  | Gissaro-Alai open woodlands   |
| 5169 | Apricot     | Home garden | UZB | Fergana Valley | Uzbek  | Gissaro-Alai open woodlands   |
| 5169 | Grapevine   | Home garden | UZB | Fergana Valley | Uzbek  | Gissaro-Alai open woodlands   |
| 5170 | Apricot     | Orchard     | UZB | Fergana Valley | Uzbek  | Alai-Western Tian Shan steppe |
| 5171 | Grapevine   | Home garden | UZB | Fergana Valley | Uzbek  | Gissaro-Alai open woodlands   |
| 5172 | Apricot     | Orchard     | UZB | Fergana Valley | Uzbek  | Gissaro-Alai open woodlands   |
| 5172 | Grapevine   | Orchard     | UZB | Fergana Valley | Uzbek  | Gissaro-Alai open woodlands   |
| 5173 | Apricot     | Home garden | UZB | Fergana Valley | Uzbek  | Alai-Western Tian Shan steppe |
| 5173 | Pomegranate | Home garden | UZB | Fergana Valley | Uzbek  | Alai-Western Tian Shan steppe |
| 5174 | Apricot     | Home garden | UZB | Fergana Valley | Uzbek  | Alai-Western Tian Shan steppe |
| 5174 | Grapevine   | Orchard     | UZB | Fergana Valley | Uzbek  | Alai-Western Tian Shan steppe |
| 5175 | Apricot     | Home garden | UZB | Fergana Valley | Uzbek  | Alai-Western Tian Shan steppe |
| 5175 | Grapevine   | Home garden | UZB | Fergana Valley | Uzbek  | Alai-Western Tian Shan steppe |

Table S3. Varietal diversity at household level

| HH ID | Almond | Apple | Apricot | Cherry plum | Currant | Grapevine | Pear | Pomegranate | Walnut |
|-------|--------|-------|---------|-------------|---------|-----------|------|-------------|--------|
| 1001  |        | 5     | 1       |             |         | 1         |      |             |        |
| 1002  |        | 15    |         |             |         |           |      |             |        |
| 1003  |        | 5     |         |             |         |           | 1    |             |        |
| 1004  |        |       |         |             |         | 1         |      |             |        |
| 1005  |        | 8     | 3       |             |         |           |      |             |        |
| 1006  |        | 7     |         |             |         |           | 1    |             |        |
| 1007  |        |       |         |             |         | 1         |      |             |        |
| 1008  |        | 1     |         |             |         |           |      |             |        |
| 1009  |        | 22    |         |             |         |           | 3    |             |        |
| 1010  |        | 13    |         |             |         |           | 2    |             |        |
| 1011  |        | 13    |         |             |         |           | 3    |             |        |
| 1012  |        |       |         |             |         | 7         |      |             |        |
| 1013  |        | 4     |         |             |         |           |      |             |        |
| 1014  |        | 10    |         |             |         |           |      |             |        |
| 1015  |        | 8     |         |             |         |           |      |             |        |
| 1016  |        | 1     |         |             |         |           |      |             |        |
| 1017  |        | 3     |         |             |         | 4         |      |             |        |
| 1018  |        |       |         |             |         | 12        |      |             |        |
| 1019  |        | 3     |         |             |         |           |      |             |        |
| 1020  |        |       |         |             |         | 1         |      |             |        |
| 1021  |        |       | 2       |             |         |           |      |             |        |
| 1022  |        |       |         |             |         |           | 1    |             |        |
| 1023  |        | 3     | 1       |             |         |           |      |             |        |
| 1024  |        | 10    |         |             |         |           |      |             |        |
| 1025  |        |       |         |             |         | 2         |      |             |        |
| 1026  |        | 3     |         |             |         | 5         |      |             |        |
| 1027  |        | 9     | 3       |             |         | 1         | 2    |             |        |
| 1028  |        | 2     | 1       |             |         |           |      |             |        |
| 1029  |        | 3     |         |             |         |           | 1    |             |        |
| 1030  |        | 4     |         |             |         | 4         | 1    |             |        |
| 1031  |        | 13    |         |             |         |           | 4    |             |        |
| 1032  |        | 4     |         |             |         | 3         |      |             |        |
| 1033  |        | 6     | 1       |             |         | 1         | 1    |             |        |
| 1034  |        | 2     |         |             |         |           |      |             |        |
| 1035  |        | 3     |         |             |         |           |      |             |        |
| 1036  |        |       |         |             |         | 1         |      |             |        |
| 1037  |        | 14    |         |             |         |           |      |             |        |

|      |  |    |   |  |  |   |   |  |   |
|------|--|----|---|--|--|---|---|--|---|
| 1038 |  | 3  |   |  |  |   | 3 |  |   |
| 1039 |  |    | 1 |  |  |   |   |  |   |
| 1040 |  |    |   |  |  | 3 |   |  |   |
| 1041 |  | 5  |   |  |  |   | 2 |  |   |
| 1042 |  | 12 |   |  |  |   |   |  |   |
| 1043 |  |    |   |  |  | 1 |   |  |   |
| 1044 |  | 2  |   |  |  |   |   |  |   |
| 1045 |  | 12 | 3 |  |  |   | 2 |  |   |
| 1046 |  | 4  | 1 |  |  |   |   |  |   |
| 1047 |  | 4  |   |  |  |   |   |  |   |
| 1048 |  | 2  |   |  |  |   | 1 |  |   |
| 1049 |  | 4  |   |  |  | 2 |   |  |   |
| 1050 |  |    | 3 |  |  | 3 |   |  |   |
| 1051 |  | 5  |   |  |  |   | 2 |  |   |
| 1052 |  | 6  | 1 |  |  | 1 |   |  |   |
| 1053 |  | 13 |   |  |  |   | 2 |  |   |
| 1054 |  | 9  | 4 |  |  |   | 2 |  |   |
| 1055 |  | 4  |   |  |  |   | 2 |  |   |
| 1056 |  | 9  |   |  |  |   | 5 |  |   |
| 1057 |  | 8  |   |  |  |   |   |  |   |
| 1058 |  | 3  |   |  |  |   | 2 |  |   |
| 1059 |  | 3  |   |  |  | 3 | 1 |  |   |
| 1060 |  | 3  |   |  |  |   |   |  |   |
| 1061 |  |    |   |  |  | 1 |   |  |   |
| 1062 |  | 7  |   |  |  |   |   |  |   |
| 1063 |  |    |   |  |  | 4 |   |  |   |
| 1064 |  | 11 | 1 |  |  |   | 4 |  |   |
| 2001 |  |    | 3 |  |  |   |   |  |   |
| 2002 |  |    | 2 |  |  |   |   |  |   |
| 2003 |  |    | 3 |  |  |   |   |  |   |
| 2004 |  |    | 3 |  |  |   |   |  |   |
| 2005 |  |    | 5 |  |  |   |   |  |   |
| 2006 |  |    | 3 |  |  |   |   |  |   |
| 2007 |  |    |   |  |  | 2 |   |  |   |
| 2008 |  |    |   |  |  | 1 |   |  |   |
| 2021 |  | 7  |   |  |  |   |   |  | 3 |
| 2022 |  | 6  |   |  |  |   |   |  | 2 |
| 2023 |  | 10 |   |  |  |   |   |  | 3 |
| 2025 |  |    |   |  |  |   |   |  | 3 |
| 2026 |  |    |   |  |  |   |   |  | 3 |
| 2027 |  | 3  |   |  |  |   |   |  | 3 |
| 2028 |  | 5  |   |  |  |   |   |  | 3 |



|      |  |    |  |  |   |    |   |  |   |
|------|--|----|--|--|---|----|---|--|---|
| 2029 |  | 4  |  |  |   |    |   |  |   |
| 2033 |  | 5  |  |  |   |    |   |  | 2 |
| 2034 |  | 4  |  |  |   |    |   |  | 2 |
| 2035 |  | 3  |  |  |   |    |   |  | 3 |
| 2039 |  |    |  |  |   |    |   |  | 3 |
| 2040 |  |    |  |  |   |    |   |  | 3 |
| 2041 |  |    |  |  |   |    |   |  | 3 |
| 2047 |  | 5  |  |  |   |    |   |  |   |
| 2048 |  | 4  |  |  |   |    |   |  |   |
| 2049 |  | 8  |  |  |   |    |   |  |   |
| 2050 |  |    |  |  | 1 |    |   |  |   |
| 2052 |  |    |  |  | 2 |    |   |  |   |
| 2053 |  | 3  |  |  |   |    |   |  |   |
| 2055 |  | 8  |  |  | 1 |    |   |  |   |
| 2056 |  | 9  |  |  |   |    |   |  |   |
| 2057 |  | 11 |  |  | 1 |    |   |  |   |
| 2058 |  | 19 |  |  | 2 |    |   |  |   |
| 2059 |  | 7  |  |  | 2 |    |   |  |   |
| 2060 |  |    |  |  | 1 |    |   |  |   |
| 2061 |  | 8  |  |  | 1 |    |   |  |   |
| 2062 |  | 14 |  |  |   |    |   |  |   |
| 2065 |  | 5  |  |  | 3 |    |   |  |   |
| 2066 |  | 9  |  |  |   |    |   |  |   |
| 2067 |  | 3  |  |  | 2 |    |   |  |   |
| 2068 |  |    |  |  | 1 |    |   |  |   |
| 2069 |  |    |  |  | 1 |    |   |  |   |
| 2070 |  | 3  |  |  |   |    |   |  |   |
| 2075 |  |    |  |  |   | 17 |   |  |   |
| 2076 |  |    |  |  |   | 15 |   |  |   |
| 2077 |  |    |  |  |   | 6  |   |  |   |
| 2078 |  |    |  |  |   | 1  |   |  |   |
| 2079 |  |    |  |  |   | 1  |   |  |   |
| 2080 |  |    |  |  |   | 3  |   |  |   |
| 2081 |  |    |  |  |   | 18 |   |  |   |
| 2082 |  |    |  |  |   | 10 |   |  |   |
| 3001 |  |    |  |  |   | 6  |   |  |   |
| 3002 |  |    |  |  |   | 4  |   |  |   |
| 3003 |  | 5  |  |  |   |    |   |  |   |
| 3004 |  | 2  |  |  |   |    |   |  |   |
| 3005 |  | 1  |  |  |   |    |   |  |   |
| 3006 |  |    |  |  |   |    | 1 |  |   |
| 3008 |  |    |  |  |   |    |   |  | 2 |

|      |  |    |    |   |   |   |  |   |
|------|--|----|----|---|---|---|--|---|
| 3010 |  | 3  |    |   |   |   |  |   |
| 3011 |  |    | 10 |   |   |   |  |   |
| 3012 |  | 4  |    |   |   |   |  |   |
| 3013 |  |    | 7  |   |   |   |  |   |
| 3014 |  |    |    |   |   | 2 |  |   |
| 3015 |  |    |    |   |   | 4 |  |   |
| 3016 |  |    |    |   |   | 6 |  |   |
| 3017 |  |    |    |   |   | 3 |  |   |
| 3018 |  | 10 |    |   |   |   |  |   |
| 3019 |  | 2  |    |   |   |   |  |   |
| 3020 |  |    |    |   |   | 3 |  |   |
| 3021 |  |    |    |   |   | 3 |  |   |
| 3022 |  |    |    |   | 4 |   |  |   |
| 3023 |  |    |    |   | 3 |   |  |   |
| 3024 |  | 4  |    |   |   |   |  |   |
| 3025 |  | 3  |    |   |   |   |  |   |
| 3026 |  |    | 12 |   |   |   |  |   |
| 3027 |  |    | 5  |   |   |   |  |   |
| 3028 |  | 3  | 4  |   |   |   |  |   |
| 3029 |  | 1  |    |   |   |   |  |   |
| 3030 |  |    | 5  |   |   |   |  |   |
| 3031 |  |    |    |   |   | 1 |  |   |
| 3032 |  |    |    |   |   | 1 |  |   |
| 3033 |  |    |    |   |   |   |  | 1 |
| 3034 |  |    |    |   |   | 1 |  |   |
| 3035 |  |    |    |   |   | 3 |  |   |
| 3036 |  |    |    |   |   |   |  | 1 |
| 3037 |  | 2  |    |   |   |   |  |   |
| 3040 |  | 5  |    |   |   |   |  |   |
| 3041 |  |    |    |   |   |   |  | 4 |
| 3042 |  | 5  |    |   |   |   |  |   |
| 3043 |  |    |    |   |   |   |  | 2 |
| 3047 |  | 9  | 3  |   |   |   |  |   |
| 4001 |  |    |    |   |   | 5 |  |   |
| 4002 |  |    |    |   |   | 7 |  |   |
| 4003 |  |    | 2  |   |   |   |  |   |
| 4004 |  |    | 7  |   |   |   |  |   |
| 4005 |  |    |    | 6 |   |   |  |   |
| 4006 |  |    | 6  |   |   |   |  |   |
| 4007 |  |    | 6  |   |   |   |  |   |
| 4008 |  |    | 6  |   |   |   |  |   |
| 4009 |  |    | 5  |   |   |   |  |   |

|      |   |   |   |   |  |  |   |   |  |
|------|---|---|---|---|--|--|---|---|--|
| 4010 |   |   |   | 5 |  |  |   |   |  |
| 4011 |   |   | 4 |   |  |  |   |   |  |
| 4012 |   |   |   |   |  |  | 4 |   |  |
| 4014 |   |   |   | 3 |  |  |   |   |  |
| 4015 |   |   |   | 3 |  |  |   |   |  |
| 4016 |   |   |   |   |  |  | 4 |   |  |
| 4017 |   |   | 5 |   |  |  |   |   |  |
| 4018 |   |   | 3 |   |  |  |   |   |  |
| 4019 |   |   |   | 5 |  |  |   |   |  |
| 4020 |   |   |   | 4 |  |  |   |   |  |
| 4021 |   |   |   | 6 |  |  |   |   |  |
| 4022 |   |   |   | 7 |  |  |   |   |  |
| 4023 |   |   |   |   |  |  | 5 |   |  |
| 4024 |   |   |   |   |  |  | 4 |   |  |
| 4025 | 4 |   |   |   |  |  |   |   |  |
| 4028 | 3 |   |   |   |  |  |   |   |  |
| 4029 | 4 |   |   |   |  |  |   |   |  |
| 4030 | 3 |   |   |   |  |  |   |   |  |
| 4033 | 2 |   |   |   |  |  |   |   |  |
| 4046 |   |   |   |   |  |  |   | 6 |  |
| 4047 |   |   |   |   |  |  |   | 5 |  |
| 4048 |   |   |   |   |  |  |   | 9 |  |
| 4049 |   |   |   |   |  |  |   | 6 |  |
| 4052 |   | 6 |   |   |  |  |   |   |  |
| 4053 |   | 4 |   |   |  |  |   |   |  |
| 4054 |   | 6 |   |   |  |  |   |   |  |
| 4055 |   | 5 |   |   |  |  |   |   |  |
| 4056 |   | 5 |   |   |  |  |   |   |  |
| 4057 |   | 5 |   |   |  |  |   |   |  |
| 4058 |   | 5 |   |   |  |  |   |   |  |
| 4059 |   | 3 |   |   |  |  |   |   |  |
| 4060 |   | 4 |   |   |  |  |   |   |  |
| 4061 |   | 5 |   |   |  |  |   |   |  |
| 4062 |   | 6 |   |   |  |  |   |   |  |
| 4063 |   | 6 |   |   |  |  |   |   |  |
| 4064 |   | 9 |   |   |  |  |   |   |  |
| 4065 |   | 4 |   |   |  |  |   |   |  |
| 4066 |   | 8 |   |   |  |  |   |   |  |
| 4067 |   | 2 |   |   |  |  |   |   |  |
| 4068 |   | 4 |   |   |  |  |   |   |  |
| 4069 |   | 4 |   |   |  |  |   |   |  |
| 4070 |   | 6 |   |   |  |  |   |   |  |

|      |  |   |   |   |  |   |   |   |  |
|------|--|---|---|---|--|---|---|---|--|
| 4071 |  | 6 |   |   |  |   |   |   |  |
| 4072 |  |   |   | 4 |  |   |   |   |  |
| 4074 |  |   | 3 |   |  |   |   |   |  |
| 4075 |  |   | 4 |   |  |   |   |   |  |
| 4078 |  |   |   |   |  |   | 5 |   |  |
| 4079 |  |   | 6 |   |  |   |   |   |  |
| 4081 |  |   |   |   |  |   | 6 |   |  |
| 4082 |  |   |   | 4 |  |   |   |   |  |
| 4083 |  |   | 4 |   |  |   |   |   |  |
| 4085 |  |   |   |   |  | 5 |   |   |  |
| 4086 |  |   |   |   |  | 8 |   |   |  |
| 4087 |  |   |   |   |  | 7 |   |   |  |
| 4088 |  |   |   |   |  | 5 |   |   |  |
| 4089 |  |   |   |   |  | 2 |   |   |  |
| 4091 |  |   |   |   |  | 3 |   |   |  |
| 4092 |  |   |   |   |  | 3 |   |   |  |
| 4093 |  |   |   |   |  | 1 |   |   |  |
| 4094 |  |   |   |   |  | 1 |   |   |  |
| 4095 |  |   |   |   |  | 1 |   |   |  |
| 4096 |  |   |   |   |  | 3 |   |   |  |
| 4097 |  |   |   |   |  | 5 |   |   |  |
| 4098 |  |   |   |   |  | 2 |   |   |  |
| 4099 |  |   |   |   |  | 1 |   |   |  |
| 5001 |  |   | 6 |   |  | 4 |   | 3 |  |
| 5002 |  |   |   |   |  |   |   | 3 |  |
| 5003 |  |   | 6 |   |  | 5 |   |   |  |
| 5004 |  |   | 8 |   |  | 5 |   | 2 |  |
| 5005 |  |   | 5 |   |  |   |   |   |  |
| 5006 |  |   |   |   |  |   |   | 2 |  |
| 5007 |  |   |   |   |  |   |   | 3 |  |
| 5008 |  |   | 7 |   |  |   |   |   |  |
| 5009 |  |   | 6 |   |  | 1 |   |   |  |
| 5010 |  |   | 6 |   |  | 5 |   | 4 |  |
| 5011 |  |   | 5 |   |  |   |   |   |  |
| 5012 |  |   | 3 |   |  |   |   |   |  |
| 5013 |  |   | 4 |   |  |   |   |   |  |
| 5014 |  |   | 5 |   |  |   |   |   |  |
| 5015 |  |   | 3 |   |  | 3 |   |   |  |
| 5016 |  |   | 5 |   |  |   |   |   |  |
| 5017 |  |   | 3 |   |  |   |   |   |  |
| 5018 |  |   | 5 |   |  |   |   |   |  |
| 5019 |  | 4 |   |   |  |   |   |   |  |

|      |  |   |   |  |  |    |   |   |  |
|------|--|---|---|--|--|----|---|---|--|
| 5020 |  | 3 |   |  |  |    |   |   |  |
| 5021 |  | 4 |   |  |  |    |   |   |  |
| 5022 |  | 2 |   |  |  |    |   |   |  |
| 5023 |  | 3 |   |  |  |    |   |   |  |
| 5024 |  | 4 |   |  |  |    |   |   |  |
| 5025 |  | 4 |   |  |  |    |   |   |  |
| 5026 |  | 3 |   |  |  |    |   |   |  |
| 5027 |  | 4 |   |  |  |    |   |   |  |
| 5028 |  |   |   |  |  |    | 5 |   |  |
| 5029 |  |   |   |  |  |    | 2 |   |  |
| 5030 |  |   |   |  |  |    | 3 |   |  |
| 5031 |  |   |   |  |  |    | 3 |   |  |
| 5032 |  |   |   |  |  |    | 4 |   |  |
| 5033 |  |   | 5 |  |  |    |   |   |  |
| 5034 |  |   | 4 |  |  |    |   |   |  |
| 5035 |  |   | 4 |  |  |    |   |   |  |
| 5036 |  |   | 5 |  |  |    |   |   |  |
| 5037 |  |   | 3 |  |  |    |   |   |  |
| 5038 |  |   | 4 |  |  |    |   |   |  |
| 5039 |  | 4 | 5 |  |  |    |   |   |  |
| 5040 |  | 4 | 5 |  |  |    |   | 2 |  |
| 5041 |  | 5 | 9 |  |  |    |   |   |  |
| 5042 |  | 3 |   |  |  |    |   |   |  |
| 5043 |  | 3 |   |  |  |    |   |   |  |
| 5044 |  | 1 |   |  |  |    |   |   |  |
| 5045 |  | 3 |   |  |  |    |   |   |  |
| 5046 |  | 2 |   |  |  |    |   |   |  |
| 5047 |  | 4 |   |  |  |    |   |   |  |
| 5048 |  | 5 |   |  |  |    |   |   |  |
| 5049 |  | 4 |   |  |  |    |   |   |  |
| 5050 |  |   |   |  |  | 2  |   |   |  |
| 5051 |  | 6 |   |  |  |    |   |   |  |
| 5052 |  | 5 |   |  |  |    |   |   |  |
| 5053 |  | 2 |   |  |  |    |   |   |  |
| 5054 |  |   |   |  |  |    | 3 |   |  |
| 5055 |  |   |   |  |  | 2  | 5 |   |  |
| 5056 |  |   |   |  |  | 4  |   |   |  |
| 5057 |  |   |   |  |  | 2  |   |   |  |
| 5058 |  |   |   |  |  | 5  |   |   |  |
| 5059 |  |   |   |  |  | 10 |   |   |  |
| 5060 |  |   |   |  |  | 3  |   |   |  |
| 5061 |  |   |   |  |  | 3  |   |   |  |

|      |   |   |   |  |  |   |   |   |   |
|------|---|---|---|--|--|---|---|---|---|
| 5062 |   |   |   |  |  | 3 |   |   |   |
| 5063 |   |   |   |  |  | 1 |   |   |   |
| 5064 |   |   |   |  |  | 1 |   |   |   |
| 5065 |   |   |   |  |  | 3 |   |   |   |
| 5066 |   |   |   |  |  | 4 |   |   |   |
| 5067 |   |   |   |  |  | 2 |   |   |   |
| 5068 |   |   |   |  |  | 1 |   |   |   |
| 5069 |   |   |   |  |  | 2 |   |   |   |
| 5070 |   |   |   |  |  | 3 |   |   |   |
| 5071 |   |   |   |  |  | 2 |   |   |   |
| 5072 |   |   |   |  |  | 1 |   |   |   |
| 5074 |   |   |   |  |  | 1 |   |   |   |
| 5075 |   |   |   |  |  | 2 |   |   |   |
| 5076 |   |   |   |  |  | 3 |   |   |   |
| 5077 |   |   |   |  |  | 4 |   |   |   |
| 5078 |   |   | 3 |  |  |   |   |   |   |
| 5079 |   |   | 5 |  |  |   |   |   |   |
| 5080 |   | 4 | 7 |  |  |   |   |   |   |
| 5081 |   | 1 |   |  |  |   |   |   |   |
| 5082 |   | 1 |   |  |  |   | 4 |   |   |
| 5083 |   |   | 7 |  |  |   |   |   |   |
| 5084 |   |   | 4 |  |  |   |   |   |   |
| 5085 |   |   | 1 |  |  |   |   |   |   |
| 5086 |   |   | 5 |  |  |   |   |   |   |
| 5087 |   |   | 5 |  |  |   |   |   |   |
| 5088 |   |   | 4 |  |  |   |   |   |   |
| 5089 |   |   |   |  |  |   |   | 4 |   |
| 5090 |   |   | 2 |  |  |   |   |   |   |
| 5091 |   |   |   |  |  |   |   | 8 |   |
| 5092 |   |   |   |  |  |   |   | 6 |   |
| 5094 |   | 3 |   |  |  |   | 1 |   |   |
| 5095 |   | 1 |   |  |  |   |   |   |   |
| 5096 |   | 3 |   |  |  |   |   |   |   |
| 5097 | 1 |   |   |  |  |   |   |   |   |
| 5098 | 1 |   |   |  |  |   | 1 |   | 1 |
| 5099 |   | 3 |   |  |  |   | 3 |   |   |
| 5100 |   | 4 |   |  |  |   |   |   |   |
| 5101 |   |   |   |  |  |   | 1 |   |   |
| 5102 |   | 6 |   |  |  |   | 1 |   | 1 |
| 5103 |   | 3 |   |  |  |   | 2 |   | 1 |
| 5104 |   | 5 |   |  |  |   | 2 |   |   |
| 5105 |   | 3 |   |  |  |   |   |   | 2 |

|      |   |   |   |  |  |   |   |   |   |
|------|---|---|---|--|--|---|---|---|---|
| 5106 |   | 2 |   |  |  |   |   |   |   |
| 5107 |   |   |   |  |  |   |   |   | 1 |
| 5108 |   | 3 |   |  |  |   |   |   |   |
| 5109 |   | 1 |   |  |  |   |   |   | 1 |
| 5111 |   |   |   |  |  | 2 |   |   |   |
| 5112 |   | 3 |   |  |  | 4 |   |   |   |
| 5113 |   | 1 |   |  |  | 2 |   |   |   |
| 5114 |   | 5 |   |  |  | 3 |   |   |   |
| 5115 | 1 |   |   |  |  |   |   |   | 2 |
| 5116 | 2 | 1 |   |  |  |   | 4 |   | 1 |
| 5117 |   | 1 |   |  |  |   |   |   | 2 |
| 5118 |   |   |   |  |  |   |   |   | 1 |
| 5119 |   | 1 |   |  |  |   | 1 |   | 1 |
| 5120 |   | 1 |   |  |  |   | 2 |   |   |
| 5127 |   |   |   |  |  |   | 4 |   |   |
| 5129 |   |   |   |  |  |   |   | 4 |   |
| 5130 |   |   |   |  |  | 4 |   |   |   |
| 5131 |   |   |   |  |  | 5 |   |   |   |
| 5132 |   | 3 |   |  |  |   |   |   |   |
| 5133 |   |   |   |  |  | 2 |   |   |   |
| 5138 | 2 |   |   |  |  |   |   |   |   |
| 5139 | 1 |   |   |  |  |   |   |   |   |
| 5141 |   |   |   |  |  |   |   |   | 1 |
| 5142 |   |   |   |  |  |   |   |   | 3 |
| 5143 |   |   |   |  |  |   |   |   | 6 |
| 5144 |   |   |   |  |  |   |   |   | 5 |
| 5145 |   |   |   |  |  | 7 |   |   |   |
| 5146 |   | 3 | 4 |  |  |   |   |   |   |
| 5147 |   |   |   |  |  | 7 |   |   |   |
| 5148 |   | 7 |   |  |  |   |   |   |   |
| 5149 |   |   |   |  |  |   | 1 |   |   |
| 5150 |   | 5 |   |  |  |   |   |   |   |
| 5151 |   | 2 |   |  |  |   | 2 |   |   |
| 5152 |   | 1 |   |  |  |   |   |   |   |
| 5153 |   |   |   |  |  | 4 |   |   |   |
| 5154 |   | 7 |   |  |  |   |   |   |   |
| 5155 |   | 5 |   |  |  |   | 3 |   |   |
| 5156 |   | 6 |   |  |  |   |   |   |   |
| 5157 |   |   |   |  |  | 8 |   |   |   |
| 5158 |   |   | 6 |  |  | 3 |   |   |   |
| 5159 |   |   | 5 |  |  |   |   |   |   |
| 5160 |   | 4 |   |  |  |   |   |   |   |

|      |  |   |   |  |  |   |   |   |  |
|------|--|---|---|--|--|---|---|---|--|
| 5161 |  |   | 3 |  |  | 8 |   |   |  |
| 5162 |  |   | 1 |  |  |   |   | 3 |  |
| 5163 |  |   |   |  |  |   |   | 1 |  |
| 5164 |  |   | 5 |  |  |   |   |   |  |
| 5165 |  |   | 6 |  |  | 4 |   |   |  |
| 5166 |  |   | 3 |  |  | 2 |   |   |  |
| 5167 |  | 2 |   |  |  |   | 6 |   |  |
| 5168 |  | 6 |   |  |  |   | 8 |   |  |
| 5169 |  |   | 7 |  |  | 5 |   |   |  |
| 5170 |  |   | 3 |  |  |   |   |   |  |
| 5171 |  |   |   |  |  | 3 |   |   |  |
| 5172 |  |   | 1 |  |  | 2 |   |   |  |
| 5173 |  |   | 9 |  |  |   |   | 4 |  |
| 5174 |  |   | 7 |  |  | 4 |   |   |  |
| 5175 |  |   | 5 |  |  | 4 |   |   |  |



Table S4. Variety names and types per crop at project level

| Crop    | Variety name      | Variety type (M=Traditional, И= Introduced, C= Modern) |
|---------|-------------------|--------------------------------------------------------|
| Apricot | Ак кандак         | М                                                      |
| Apricot | Ак пишар          | М                                                      |
| Apricot | Ак урик           | М                                                      |
| Apricot | Ак ширпайванди    | М                                                      |
| Apricot | Арзами            | М                                                      |
| Apricot | Ахрори            | М                                                      |
| Apricot | Бодом урик        | М                                                      |
| Apricot | Бодомак           | М                                                      |
| Apricot | Венгерский        | М                                                      |
| Apricot | Ёгли (мойли)      | М                                                      |
| Apricot | Ёзги хашаки       | М                                                      |
| Apricot | Жавзаки           | М                                                      |
| Apricot | Жамбил            | М                                                      |
| Apricot | Исфарак (Испарак) | М                                                      |
| Apricot | Кандак            | М                                                      |
| Apricot | Кандак желтый     | М                                                      |
| Apricot | Кандак красный    | М                                                      |
| Apricot | Кандак майда      | М                                                      |
| Apricot | Кандак хашаки     | М                                                      |
| Apricot | Ковун урик        | М                                                      |
| Apricot | Краснощекий       | И                                                      |
| Apricot | Курсадик          | М                                                      |
| Apricot | Лолача            | М                                                      |
| Apricot | Лючак             | М                                                      |
| Apricot | Майский           | М                                                      |
| Apricot | Майский белый     | М                                                      |
| Apricot | Майский желтый    | М                                                      |
| Apricot | Олма урик         | М                                                      |
| Apricot | Пайванди          | М                                                      |
| Apricot | Пах-паха          | М                                                      |
| Apricot | Рухи джуванон     | М                                                      |
| Apricot | Сарик урик        | М                                                      |
| Apricot | Субхони           | М                                                      |
| Apricot | Хурмаи            | М                                                      |
| Apricot | Чилдона           | М                                                      |
| Apricot | Шалах             | И                                                      |
| Apricot | Шафтолисимон      | М                                                      |
| Apricot | Ширпайванди       | М                                                      |
| Apricot | Эрта ак пишар     | М                                                      |
| Apricot | Юбилейный Навои   | С                                                      |
| Apricot | Юрт уриги         | М                                                      |

|                |                       |   |
|----------------|-----------------------|---|
| Apricot        | Ялырок                | М |
| Apricot        | Ак исфарак            | И |
| Apricot        | Ворухи                | М |
| Apricot        | Гулхак                | М |
| Apricot        | Ерли                  | М |
| Apricot        | Комсомолец            | И |
| Apricot        | Консервный            | И |
| Apricot        | Мафтоби (Махтоби)     | М |
| Apricot        | Мафтоби зард          | М |
| Apricot        | Мирман                | М |
| Apricot        | Мирсанджали           | М |
| Apricot        | Навотак               | М |
| Apricot        | Никитский             | М |
| Apricot        | Никитский краснощекий | М |
| Apricot        | Нукул                 | М |
| Apricot        | Персиковый            | М |
| Apricot        | Сафетдаг              | М |
| Apricot        | Субхони кизил         | И |
| Apricot        | Тулаки                | М |
| Apricot        | Худжамири             | М |
| Apricot        | Худжанди              | М |
| Apricot        | Чарбак                | М |
| Apricot        | Чулак                 | М |
| Apricot        | Сарыорне              | М |
| Apricot        | Кеч пишар             | М |
| Apricot        | Гульюнчи лючак        | М |
| Apricot        | Ковок урик            | М |
| Apricot        | Жавпазак              | М |
| Apricot        | Кызил урик            | М |
| Apricot        | Нукул уртаги          | М |
| Apricot        | Заря Востока          | И |
| Apricot        | Советский             | И |
| Apricot        | Кандак крупный        | М |
| Apricot        | Кандак местный        | М |
| Apricot        | Говкандак             | М |
| Apricot        | Бобои крупный         | М |
| Apricot        | Хасак                 | М |
| Apricot        | Маизи                 | М |
| Cherry<br>plum | Кок солтан            | М |
| Cherry<br>plum | Красная майская       | М |
| Cherry<br>plum | Пионерка              | И |
| Cherry<br>plum | Писсарда              | И |
| Cherry<br>plum | Малиновая             | И |

|             |                     |   |
|-------------|---------------------|---|
| Cherry plum | Южная красавица     | И |
| Cherry plum | Клаймакс            | И |
| Cherry plum | Дессертная          | И |
| Cherry plum | Золотая осень       | И |
| Cherry plum |                     | М |
| Cherry plum |                     | М |
| Grapevine   | Баян ширей          | И |
| Grapevine   | Джаус               | М |
| Grapevine   | Каберне             | И |
| Grapevine   | Каракуз             | М |
| Grapevine   | Келен бармак        | М |
| Grapevine   | Кишмиш белый        | М |
| Grapevine   | Кишмиш узун башли   | М |
| Grapevine   | Кишмиш черный       | М |
| Grapevine   | Нимранг             | М |
| Grapevine   | Паркентский         | М |
| Grapevine   | Ркацители           | И |
| Grapevine   | Саперави            | И |
| Grapevine   | Сохиби              | М |
| Grapevine   | Сурхак kitabский    | М |
| Grapevine   | Тайфи белый         | М |
| Grapevine   | Тайфи розовый       | М |
| Grapevine   | Хусайне мурча миён  | М |
| Grapevine   | Хусайни             | М |
| Grapevine   | Чарос               | М |
| Grapevine   | Чумчук тили         | М |
| Grapevine   | Кара жанжал         | М |
| Grapevine   | Гызыл тогалак       | М |
| Grapevine   | Дали халили         | М |
| Grapevine   | Гок узум нухурский  | М |
| Grapevine   | Кара узум нухурский | М |
| Grapevine   | Акмелеи             | М |
| Grapevine   | Суют узум           | М |
| Grapevine   | Гара тоголак        | М |
| Grapevine   | Гара халили         | М |
| Grapevine   | Поздний Вавилов     | С |
| Grapevine   | Кызыл сапак         | М |
| Grapevine   | Алатоо              | М |
| Grapevine   | Алма-ата            | И |
| Grapevine   | Андижанский черный  | М |
| Grapevine   | Бычий глаз          | М |
| Grapevine   | Вартан              | М |
| Grapevine   | Вассарга белая      | М |
| Grapevine   | Вестфрейзия         | М |

|           |                   |   |
|-----------|-------------------|---|
| Grapevine | Волго-Дон         | И |
| Grapevine | Гузел кара        | И |
| Grapevine | Дамский пальчик   | И |
| Grapevine | Дружба            | И |
| Grapevine | Илийский          | М |
| Grapevine | Ичкимар           | И |
| Grapevine | Карабурну         | М |
| Grapevine | Каттакурган       | М |
| Grapevine | Киргизский ранний | М |
| Grapevine | Кишмиш молдавский | И |
| Grapevine | Кишмиш Согдиана   | М |
| Grapevine | Кодрянка          | И |
| Grapevine | Кызыл танг        | М |
| Grapevine | Мадлен мускатный  | М |
| Grapevine | Мирный            | М |
| Grapevine | Молдова           | И |
| Grapevine | Мускат белый      | М |
| Grapevine | Мускат венгерский | И |
| Grapevine | Мускат розовый    | И |
| Grapevine | Мускат фиолетовый | И |
| Grapevine | Мускат черный     | М |
| Grapevine | Октябрьский       | М |
| Grapevine | Памяти Негруля    | И |
| Grapevine | Пино франк        | М |
| Grapevine | Пино черный       | И |
| Grapevine | Победа            | М |
| Grapevine | Ранний Шредера    | И |
| Grapevine | Ризамат           | И |
| Grapevine | Рислинг           | И |
| Grapevine | Севан             | И |
| Grapevine | Сенсо             | М |
| Grapevine | Советский         | И |
| Grapevine | Танзар            | М |
| Grapevine | Тербаш            | И |
| Grapevine | Тяньшаньский      | М |
| Grapevine | Черный поздний    | М |
| Grapevine | Черный принц      | М |
| Grapevine | Черный ранний     | М |
| Grapevine | Чиллаки (Чиллики) | М |
| Grapevine | Штур ангур        | М |
| Grapevine | Глобус            | И |
| Grapevine | Изабелла          | И |
| Grapevine | Зере              | М |
| Grapevine | Анита             | М |
| Grapevine | Хусайне белый     | И |
| Grapevine | Лореба            | М |
| Grapevine | Белый столовый    | М |
| Grapevine | Столовый синий    | М |

|             |                       |   |
|-------------|-----------------------|---|
| Grapevine   | Скороспелка           | М |
| Grapevine   | Кара чилги Байсунский | М |
| Grapevine   | Вассарги              | М |
| Grapevine   | Эчкимар               | М |
| Grapevine   | Тойфи                 | М |
| Grapevine   | Сиёхак                | М |
| Grapevine   | Чавз                  | М |
| Grapevine   | Говак                 | М |
| Grapevine   | Мехчадони             | М |
| Grapevine   | Ангури сурхи          | М |
| Grapevine   | Ангури сафед          | М |
| Grapevine   | Тайфи красный         | М |
| Grapevine   | Сиёхии меваги         | М |
| Pomegranate | Ак дона               | М |
| Pomegranate | Ачик дона             | М |
| Pomegranate | Кадойи                | М |
| Pomegranate | Кзаки анор            | М |
| Pomegranate | Каим анор             | М |
| Pomegranate | Кай аччик анор        | М |
| Pomegranate | Кизил анор            | М |
| Pomegranate | Кук анор              | М |
| Pomegranate | Туя Тиш               | М |
| Pomegranate | Шахрисабз             | М |
| Pomegranate | Кара данак            | М |
| Pomegranate | Кук пучок             | М |
| Pomegranate | Юпка пучок            | М |
| Pomegranate | Калин пучок           | М |
| Pomegranate | Энар                  | М |
| Pomegranate | Кызыл Нар             | М |
| Pomegranate | Гырмызы Габык         | М |

|             |                        |   |
|-------------|------------------------|---|
| Pomegranate | Гышкы Нар              | М |
| Pomegranate | Донгуз Нар             | М |
| Pomegranate | Гулаша Азербайджанская | И |
| Pomegranate | Пурпуровый             | И |
| Pomegranate | Гулашы поздний         | И |
| Pomegranate | Чекишлер               | М |
| Pomegranate | ВИР-1                  | И |
| Pomegranate | Нордон                 | М |
| Pomegranate | Гулаби                 | М |
| Pomegranate | Бедона                 | М |
| Pomegranate | Ульфи                  | М |
| Pomegranate | Ак анор                | М |
| Pear        | Бергамод               | С |
| Pear        | Бере Диль              | И |
| Pear        | Бере Лигеля            | И |
| Pear        | Вильямс                | И |
| Pear        | Дилафруз               | М |
| Pear        | Дюшес                  | С |
| Pear        | Зимняя нашвати         | М |
| Pear        | Кизил нашвати          | М |
| Pear        | Куляла                 | М |
| Pear        | Кюре                   | И |
| Pear        | Ласточка               | И |
| Pear        | Лесная красавица       | И |
| Pear        | Любимица Клаппа        | И |
| Pear        | Нашвати (Нашпоти)      | М |
| Pear        | Ноки тирамохи          | М |
| Pear        | Оливье де Серр         | И |
| Pear        | Олмурд                 | М |
| Pear        | Салом-2                | М |
| Pear        | Сары Гузель            | М |
| Pear        | Талгарская красавица   | М |
| Pear        | Тош нок                | М |
| Pear        | Шакунг                 | М |
| Pear        | Юрт нашвати            | М |
| Pear        | Мраморная              | И |

|        |                       |   |
|--------|-----------------------|---|
| Pear   | Киргизская зимняя     | М |
| Pear   | Ароматная             | И |
| Pear   | Нашвати Байсунский    | М |
| Pear   | Ок Нашвати            | М |
| Pear   | Чилляки Нашвати       | М |
| Pear   | Ташкент нок           | М |
| Pear   | Кум нок               | М |
| Pear   | Ёзги нок              | М |
| Pear   | Кишки нок             | М |
| Pear   | Нок                   | М |
| Pear   | Хусайни мурут         | М |
| Pear   | Муруди Даштиджум      | М |
| Pear   | Груша зимняя          | М |
| Pear   | Груша осенняя         | М |
| Pear   | Груша летняя          | М |
| Pear   | Муруд местный         | М |
| Pear   | Ноки пешпазак         | М |
| Pear   | Тарак                 | М |
| Pear   | Муруд тарак           | М |
| Pear   | Сурх-пешпазак         | М |
| Pear   | Гарми-тирамохи        | М |
| Pear   | Точики-махалли        | М |
| Pear   | Ноки махалли          | М |
| Almond | Бумажноскорлупый      | С |
| Almond | Форма -2              | М |
| Almond | Форма -3              | М |
| Almond | Форма-1               | М |
| Almond | Форма-4               | М |
| Almond | Форма-5               | М |
| Almond | Галвирак бодом        | М |
| Almond | Писта бодом           | М |
| Almond | Когоз бодом           | М |
| Almond | Каттик бодом          | М |
| Almond | Сарик бодом           | М |
| Apple  | Авенариус             | И |
| Apple  | Айгуль                | М |
| Apple  | Айдаред               | И |
| Apple  | Айнур                 | М |
| Apple  | Алматинский апорт     | М |
| Apple  | Алматинский бельфлер  | С |
| Apple  | Алматинское змнее     | М |
| Apple  | Антоновка             | М |
| Apple  | Апорт                 | И |
| Apple  | Апорт Александр       | М |
| Apple  | Апорт Алма-атинский   | И |
| Apple  | Апорт кроваво-красный | М |
| Apple  | Астраханское          | М |
| Apple  | Атлас                 | М |

|       |                                    |   |
|-------|------------------------------------|---|
| Apple | Атласный                           | М |
| Apple | Бабарабка кызыл                    | М |
| Apple | Бабарабка суйджи                   | М |
| Apple | Бабушкино                          | М |
| Apple | Бахорги олма                       | М |
| Apple | Белорозовка (Столовка)             | И |
| Apple | Белый налив                        | И |
| Apple | Бельфлер                           | И |
| Apple | Бельфлер желтый                    | М |
| Apple | Беш юлдуз (Бесжулдыз)              | М |
| Apple | Боровинка Ташкентская              | С |
| Apple | Вайнеспур                          | И |
| Apple | Вайнсеп                            | И |
| Apple | Восход                             | М |
| Apple | Гибрид 10-13                       | С |
| Apple | Гибрид 1-15-20                     | С |
| Apple | Голден Делишес (Голден (америкои)) | И |
| Apple | Гравенштейн                        | М |
| Apple | Грайма золотое                     | И |
| Apple | Грани смит                         | И |
| Apple | Грушовка вернерская                | М |
| Apple | Грушовка московская                | М |
| Apple | Дамира                             | М |
| Apple | Делишес                            | И |
| Apple | Джонатан                           | И |
| Apple | Дукат                              | М |
| Apple | Жовтяное                           | М |
| Apple | Заилийское                         | М |
| Apple | Заря Алатау                        | М |
| Apple | Зимний Хазараспский                | М |
| Apple | Золотое Грайма                     | И |
| Apple | Золотой пармен                     | М |
| Apple | Золотой ренет                      | М |
| Apple | Искана олма                        | М |
| Apple | Канд олма                          | М |
| Apple | Кандиль                            | М |
| Apple | Кандиль киргизский                 | И |
| Apple | Кандиль синап                      | И |
| Apple | Кара Джонатан                      | С |
| Apple | Карваки                            | М |
| Apple | Кизил олма                         | М |
| Apple | Киломун                            | М |
| Apple | Киргизское зимнее                  | И |
| Apple | Кирмизак олма                      | М |
| Apple | Кирмизак олма (из Ферганы)         | М |
| Apple | Кольжатское                        | М |
| Apple | Корей                              | И |



|       |                       |   |
|-------|-----------------------|---|
| Apple | Корнелл ред           | И |
| Apple | Косимсаркори          | М |
| Apple | Крепсон белый         | И |
| Apple | Крепсон красный       | И |
| Apple | Крымсон (Крипсон)     | И |
| Apple | Кук олма              | М |
| Apple | Кутир олма            | М |
| Apple | Кызылтан              | М |
| Apple | Кыргызское зимнее     | М |
| Apple | Лимонка               | М |
| Apple | Майский               | М |
| Apple | Мантуанер             | И |
| Apple | Медовка               | М |
| Apple | Мезгут                | М |
| Apple | Мелба                 | С |
| Apple | Мильтон               | И |
| Apple | Нагит                 | И |
| Apple | Наливка               | М |
| Apple | Нафис                 | М |
| Apple | Ок олма               | М |
| Apple | Освальд               | И |
| Apple | Пармен зимний золотой | М |
| Apple | Пахта олма (себ)      | М |
| Apple | Пепин киевский        | И |
| Apple | Первенец Самарканда   | М |
| Apple | Пеструшка             | М |
| Apple | Пинова                | И |
| Apple | Превосходный          | С |
| Apple | Протон                | И |
| Apple | Рахшак                | М |
| Apple | Рашида                | М |
| Apple | Ред делишес           | М |
| Apple | Ренет Бурхартда       | М |
| Apple | Ренет казахстанский   | М |
| Apple | Ренет Лансдбергский   | М |
| Apple | Ренет Симиренко       |   |
| Apple | (Симиренко)           | М |
| Apple | Розмарин (Размиренка) | М |
| Apple | Розмарин белый        | И |
| Apple | Румянка Алматинский   | М |
| Apple | Рухи жони             | М |
| Apple | Сайванская Красная    | М |
| Apple | Сайрамское            | М |
| Apple | Сайрамская конфетка   | М |
| Apple | Салтанат              | И |
| Apple | Санг себ              | М |
| Apple | Саратони              | С |
| Apple | Сары синап            | И |

|       |                           |   |
|-------|---------------------------|---|
| Apple | Семеринко Средняя         | И |
| Apple | Синап Алматинский         | М |
| Apple | Стаканчик                 | М |
| Apple | Суйслепер                 | М |
| Apple | Сурхсеб разные            | М |
| Apple | Сут олма                  | М |
| Apple | Талгарское                | М |
| Apple | Тюльпан                   | М |
| Apple | Хазараспский              | М |
| Apple | Хон олма                  | М |
| Apple | Хубони                    | М |
| Apple | Чавпазак                  | М |
| Apple | Чурек олма                | М |
| Apple | Шафран                    | М |
| Apple | Шойи олма                 | М |
| Apple | Шохисеб                   | М |
| Apple | Элстар                    | И |
| Apple | Эшак олма                 | М |
| Apple | Эшак олма (Розмарин)      | М |
| Apple | Рубин                     | М |
| Apple | Дилькон                   | М |
| Apple | Достар                    | М |
| Apple | Мекинтош                  | И |
| Apple | Каравелл                  | И |
| Apple | Джона голд                | И |
| Apple | Догомызское               | И |
| Apple | Старкримсон (Старкримсон) | И |
| Apple | Сары алма (Сарик олма)    | М |
|       | Брызги шампанского        |   |
| Apple | (Томкинг)                 | С |
| Apple | Слава Победителям         | С |
| Apple | Хуммои                    | М |
| Apple | Трамои                    | М |
| Apple | Ориф ходжи бобо           | М |
| Apple | Ориф бобо                 | М |
| Apple | Фазил бобо                | М |
| Apple | Наманган олма уртаги      | М |
| Apple | Наманган олма кечки       | М |
| Apple | Фориг бобо                | М |
| Apple | Магруб бобо               | М |
| Apple | Файзи бобо                | М |
| Apple | Эртапишар                 | М |
| Apple | Ок кизил олма             | М |
| Apple | Кизил кишки олма          | М |
| Apple | Эртаги олма               | М |
| Apple | Санобар олма              | М |
| Apple | Хубони                    | М |
| Apple | Сарик олма                | М |

|        |                          |   |
|--------|--------------------------|---|
| Apple  | Кулон китайка            | М |
| Apple  | Алматинский серебристый  | М |
| Apple  | Иссык-кульская жемчужина | С |
| Apple  | Искич                    | М |
| Apple  | Носкаду                  | М |
| Apple  | Карсаксеб                | М |
| Apple  | Кандак                   | М |
| Apple  | Рауфи                    | М |
| Apple  | Бойко                    | М |
| Apple  | Махтобак                 | М |
| Apple  | Кандсеб                  | М |
| Apple  | Зеленка                  | М |
| Apple  | Хубони желтый            | М |
| Apple  | Канд себ                 | М |
| Apple  | Себи асали               | М |
| Apple  | Хубони сурх              | М |
| Apple  | Хубони зард              | М |
| Apple  | Турушак                  | М |
| Apple  | Бахори                   | М |
| Apple  | Кабуд-2                  | М |
| Apple  | Сурх-2                   | М |
| Apple  | Мелотка                  | М |
| Apple  | Малютка                  | М |
| Apple  | Тирамохи точки           | М |
| Apple  | Ширинак                  | М |
| Apple  | Пахтасеб пешпазак        | М |
| Apple  | Пахтасеб дерпазак        | М |
| Apple  | Шохусайне пешпазак       | М |
| Apple  | Шохусайне дерпазак       | М |
| Apple  | Махмадсидики             | М |
| Walnut | Канырты                  | М |
| Walnut | Курак                    | М |
| Walnut | Тизме жангак             | М |
| Walnut | Чукума                   | М |
| Walnut | Ёнгок махали             | М |
| Walnut | Ёпишкок                  | М |
| Walnut | Каргатумшук              | М |
| Walnut | Когати (Коготи)          | М |
| Walnut | Тош ёнгок                | М |
| Walnut | Чормагиз                 | М |
| Walnut | Катта ёнгок              | М |
| Walnut | Прозрачно скорлупый      | М |
| Walnut | Мелко тонкоскорлупый     | М |
| Walnut | Думолок ёнгок            | М |
| Walnut | Крупноплодный            | М |
| Walnut | Галвирай ёнгок           | М |
| Walnut | Орех грецкий удлиненный  | М |
| Walnut | Писта пучок              | М |

|         |                    |   |
|---------|--------------------|---|
| Walnut  | Магзи              | М |
| Walnut  | Коготи             | М |
| Walnut  | Серби              | И |
| Walnut  | Киргизский         | И |
| Walnut  | Туркменский        | И |
| Walnut  | Скороплодный       | И |
| Currant | Иссык-кульская     | М |
| Currant | Поздняя            | М |
| Currant | Ранняя             | М |
| Currant | Скороспелка ранняя | М |
| Currant | Среднеспелая       | М |
| Currant | Урумкан            | М |
| Currant | Черная жемчужина   | С |

Table S5. Model selection table

|    | (Intrc) | arrng | cdEcr | cdLng | strss   | df | logLik    | AICc   | delta  | weight |
|----|---------|-------|-------|-------|---------|----|-----------|--------|--------|--------|
| 16 | 1.211   | +     | +     | +     | 0.08211 | 22 | -1212.622 | 2471.0 | 0.00   | 0.976  |
| 12 | 1.470   | +     | +     |       | 0.07667 | 15 | -1224.119 | 2479.1 | 8.06   | 0.017  |
| 8  | 1.277   | +     | +     | +     |         | 21 | -1218.764 | 2481.1 | 10.13  | 0.006  |
| 4  | 1.506   | +     | +     |       |         | 14 | -1229.658 | 2488.0 | 17.03  | 0.000  |
| 15 | 1.046   |       | +     | +     | 0.08472 | 21 | -1228.671 | 2500.9 | 29.94  | 0.000  |
| 11 | 1.324   |       | +     |       | 0.07991 | 14 | -1239.684 | 2508.1 | 37.08  | 0.000  |
| 7  | 1.109   |       | +     | +     |         | 20 | -1235.085 | 2511.6 | 40.62  | 0.000  |
| 6  | 1.349   | +     |       | +     |         | 11 | -1246.910 | 2516.3 | 45.26  | 0.000  |
| 14 | 1.362   | +     |       | +     | 0.01866 | 12 | -1246.297 | 2517.1 | 46.12  | 0.000  |
| 3  | 1.359   |       | +     |       |         | 13 | -1245.600 | 2517.8 | 46.82  | 0.000  |
| 2  | 1.276   | +     |       |       |         | 4  | -1265.987 | 2540.0 | 69.03  | 0.000  |
| 10 | 1.294   | +     |       |       | 0.01954 | 5  | -1265.227 | 2540.6 | 69.55  | 0.000  |
| 5  | 1.185   |       |       | +     |         | 10 | -1266.670 | 2553.7 | 82.71  | 0.000  |
| 13 | 1.194   |       |       | +     | 0.01155 | 11 | -1266.436 | 2555.3 | 84.32  | 0.000  |
| 1  | 1.116   |       |       |       |         | 3  | -1284.868 | 2575.8 | 104.77 | 0.000  |
| 9  | 1.126   |       |       |       | 0.01246 | 4  | -1284.558 | 2577.2 | 106.18 | 0.000  |
